# Supplementary material
Source: PubMed Central journal article supplement (PMC7641197)
Supplement: supp_8.3.E535_2020-0036-2-at.pdf [file supp_8.3.E535_2020-0036-2-at.pdf]

## Appendices (as supplied by the author)

### Appendix 2. Factors considered in the analyses

We considered the following factors at the market level: 1) market structure at baseline; 2) route/dosage form; 3) essential medicines or not; 4) proportion of DINs listed on formularies; and 5) Anatomical Therapeutic Chemical (ATC) classification. At the DIN level, we considered 1) market structure at baseline; 2) route/dosage form; 3) DIN age; 4) essential medicines or not; 5) ATC classification; 6) number of provincial formularies the DIN was listed on; 7) manufacturer characteristics determined by their number of DINs available in Canada (manufacturer size), whether they are top 50 manufacturers by drug cost from public drug plans in Canada, and whether they are mainly branded manufacturers, generic manufacturers or both (manufacturer type). The definitions of these variables were shown in Supplementary Table 1- Supplementary Table 4 below.

The Canadian Drug Shortage Database includes reasons for each shortage case (by DIN and package code), as reported by manufacturers. Manufacturers can select one reason from the following options: shortage of an active ingredient, shortage of an inactive ingredient or component, disruption of the manufacture of the drug, requirements related to complying with good manufacturing practices, delay in shipping of the drug, and demand increase for the drug. Otherwise, manufacturers can comment on other reasons and based on their comments, we categorized them into either one of the above reasons or into business (or economic) reason (e.g., discontinued and deactivated), insufficient supply, other reasons (including “on allocation” and the ones we could not categorize), and reason not provided. These reasons were considered as an additional factor in our analysis of the shortage duration among DINs in shortage. Please see details in Supplementary Table 5.

**Supplementary Table 1. Variable definitions**

| Variable                   | Definition                                                                                                                   | Data Source                              |
|----------------------------|------------------------------------------------------------------------------------------------------------------------------|------------------------------------------|
| <b>Variable Level</b>      |                                                                                                                              |                                          |
| Market structure           | Based on the type and number of manufacturers for the DINs under each market at baseline (first 30 days of follow-up period) | Drug Product Database (DPD) <sup>1</sup> |
| B/G Single                 | Markets with branded manufacturers and a single generic manufacturer                                                         |                                          |
| B/G Multiple               | Markets with branded manufacturers and multiple generic manufacturers                                                        |                                          |
| G single                   | Markets with a single generic manufacturer only                                                                              |                                          |
| G multiple                 | Markets with multiple generic manufacturers                                                                                  |                                          |
| BIO                        | Markets with biological manufacturers                                                                                        |                                          |
| B only                     | Markets with branded manufacturers only                                                                                      |                                          |
| Route form                 | Route of administration and dose form                                                                                        | DPD <sup>1</sup>                         |
| Injection                  | Injection                                                                                                                    |                                          |
| Oral non-solid             | Oral non-solid                                                                                                               |                                          |
| Oral solid regular release | Oral solid regular release                                                                                                   |                                          |
| Oral solid special release | Oral solid special release                                                                                                   |                                          |

|                                                                |                                                                                                                                                                                                                                                                                                                                            |                                                                                                  |
|----------------------------------------------------------------|--------------------------------------------------------------------------------------------------------------------------------------------------------------------------------------------------------------------------------------------------------------------------------------------------------------------------------------------|--------------------------------------------------------------------------------------------------|
| Other                                                          | Routes/forms other than the above, such as topical cream/ointment, ophthalmic solution, inhalation solution, inhalation powder, transdermal patch, nasal spray, etc.                                                                                                                                                                       |                                                                                                  |
| Essential medicine                                             | Whether markets/DINs are on essential medicine list                                                                                                                                                                                                                                                                                        | Patented Medicine Prices Review Board (PMPRB) <sup>2</sup>                                       |
| Proportion of DINs listed On formularies                       | The proportion of DINs being listed on any of the nine provincial formularies for each market                                                                                                                                                                                                                                              | DPD <sup>1</sup> and formulary data <sup>3</sup>                                                 |
| Anatomical Therapeutic Chemical (ATC) Classification (Level 1) | The ATC classification system divides drugs into different groups according to the organ or system on which they act and their chemical, pharmacological and therapeutical properties. Please see the Supplementary Table 2 below for drug examples for each ATC level.                                                                    | DPD <sup>1</sup>                                                                                 |
| DIN Age                                                        | The market age of each DIN defined as the duration of time from the DIN came to market, i.e., “marketed” status shown on DPD to the start of follow up; Please see the data exploration results in Supplementary Table 3 that we used to determine whether a continuous variable or a categorical variable was used in our final analyses. | DPD <sup>1</sup>                                                                                 |
| N of provinces on formulary (weighted)                         | The number of provincial formularies a DIN was listed on and then weighted by the population size in each province                                                                                                                                                                                                                         | DPD <sup>1</sup>                                                                                 |
| <b>Manufacturer characteristics</b>                            | Detailed information for manufacturers with at least 5 DINs in shortage is reported in Supplementary Table 4                                                                                                                                                                                                                               |                                                                                                  |
| Top 50 manufacturers                                           | Based on drug cost data from public drug plans in Canada for each manufacturer in 2017/2018                                                                                                                                                                                                                                                | PMPRB <sup>4</sup>                                                                               |
| Manufacturer size                                              | The total number of DINs available in Canada for each manufacturer                                                                                                                                                                                                                                                                         | DPD <sup>1</sup>                                                                                 |
| Small                                                          | 1-39                                                                                                                                                                                                                                                                                                                                       |                                                                                                  |
| Medium                                                         | 40-99                                                                                                                                                                                                                                                                                                                                      |                                                                                                  |
| Large                                                          | ≥100                                                                                                                                                                                                                                                                                                                                       |                                                                                                  |
| Manufacturer type                                              | Defined based on the proportion of branded DINs by each manufacturer                                                                                                                                                                                                                                                                       | DPD <sup>1</sup>                                                                                 |
| Generic                                                        | The proportion ≤5%                                                                                                                                                                                                                                                                                                                         |                                                                                                  |
| Mixed                                                          | The proportion = (5%, 95%)                                                                                                                                                                                                                                                                                                                 |                                                                                                  |
| Branded                                                        | The proportion ≥95%                                                                                                                                                                                                                                                                                                                        |                                                                                                  |
| Listing price                                                  | The price listed in the provincial formularies                                                                                                                                                                                                                                                                                             | Formulary data in nine provinces from the Canadian Institute for Health Information <sup>3</sup> |

## References

1. What is the DPD data extract?: Drug Product Database (DPD). Ottawa: Health Canada. Available from: <https://www.canada.ca/en/health-canada/services/drugs-health-products/drug-products/drug-product-database/what-data-extract-drug-product-database.html> (accessed 2018 Dec. 12).

2. Alignment among public formularies in Canada — Part 1: General overview. Ottawa: Patented Medicine Prices Review Board; 2017, modified 2019 Mar. 5. Available: [www.pmprb-cepmb.gc.ca/view.asp?ccid=1327&lang=en](http://www.pmprb-cepmb.gc.ca/view.asp?ccid=1327&lang=en) (accessed 2018 Sept. 13).
3. National Prescription Drug Utilization Information System metadata. Ottawa: Canadian Institute for Health Information. Available: [www.cihi.ca/en/national-prescription-drug-utilization-information-system-metadata](http://www.cihi.ca/en/national-prescription-drug-utilization-information-system-metadata) (accessed 2018 Jan. 30).
4. CompassRx, 5th edition: Annual Public Drug Plan Expenditure Report, 2017/18. Cat no H79-6E-PDF. Ottawa: Patented Medicine Prices Review Board; 2019. Available: [www.pmprb-cepmb.gc.ca/view.asp?ccid=1474&lang=en#a23](http://www.pmprb-cepmb.gc.ca/view.asp?ccid=1474&lang=en#a23) (accessed 2019 Oct. 23).

**Supplementary Table 2. Drug shortage by Anatomical Therapeutic Chemical (ATC) Classification**

| ATC | Description                                                      | N   | Percent | Examples                                                                                                       |
|-----|------------------------------------------------------------------|-----|---------|----------------------------------------------------------------------------------------------------------------|
| A   | Alimentary tract and metabolism                                  | 136 | 6.1%    |                                                                                                                |
| A01 | Stomatological preparations                                      | 5   | 0.2%    | Apo Benzydamine Oral Rinse 0.15% Sol, Apo Chlorhexidine Oral Rinse 0.12% Sol, Perichlor 0.12% Mouthwash/Gargle |
| A02 | Drugs for acid related disorders                                 | 49  | 2.2%    | Ran Pantoprazole 20mg Tab Dr, Ran Rabeprazole 20mg Tab Dr, Ranitidine 300mg Tab                                |
| A03 | Drugs for functional gastrointestinal disorders                  | 8   | 0.4%    | Mar Domperidone 10mg Tab, Modulon 200mg Tab, Ran Domperidone 10mg Tab                                          |
| A04 | Antiemetics and antinauseants                                    | 22  | 1.0%    | Cesamet 0.25mg Cap, Cesamet 1mg Cap, Ondansetron Injection Usp 2mg/ML Sol                                      |
| A05 | Bile and liver therapy                                           | 2   | 0.1%    | Pms Ursodiol C 500mg Tab                                                                                       |
| A07 | Antidiarrheals, intestinal antiinflammatory/antiinfective agents | 5   | 0.2%    | Cortifoam 10% Aero, Difucid 200mg Tab, Entocort 2.3mg, 115ml Kit                                               |
| A09 | Digestives, incl. enzymes                                        | 1   | <0.1%   | Cotazym Ecs 8 10800unit, 45000unit, 42000unit Cap Dr                                                           |
| A10 | Drugs used in diabetes                                           | 39  | 1.8%    | Accel Pioglitazone 30mg Tab, Apo Glimepiride 1mg Tab, Apo Repaglinide 2mg Tab                                  |
| A11 | Vitamins                                                         | 3   | 0.1%    | Euro-D 50000 Iu, Pharma D 10000unit Cap                                                                        |
| A16 | Other alimentary tract and metabolism products                   | 2   | 0.1%    | Carnitor 330mg Tab, Carnitor Iv 200mg/ML Sol                                                                   |
| B   | Blood and blood forming organs                                   | 20  | 0.9%    |                                                                                                                |
| B01 | Antithrombotic agents                                            | 17  | 0.8%    | Arixtra 5mg/ML Sol, Coumadin 10mg Tab, Coumadin 6mg Tab                                                        |
| B02 | Antihemorrhagics                                                 | 1   | <0.1%   | Trasylol 10000u/ML Sol                                                                                         |
| B03 | Antianemic preparations                                          | 2   | 0.1%    | Apo Folic Acid 5mg Tab                                                                                         |
| C   | Cardiovascular system                                            | 498 | 22.5%   |                                                                                                                |
| C01 | Cardiac therapy                                                  | 29  | 1.3%    | Bretylium Tosylate Injection Usp 50mg/ML, Midodrine 2.5mg Tab, Myl Propafenone 150mg Tab                       |
| C02 | Antihypertensives                                                | 20  | 0.9%    | Apo Clonidine 0.2mg Tab, Apo Doxazosin 4mg Tab, Apo Hydralazine 25mg Tab                                       |
| C03 | Diuretics                                                        | 27  | 1.2%    | Aldactazide 25 25mg, 25mg Tab, Furosemide Special 250mg/25ml Sol, Inspira 25mg Tab                             |
| C04 | Peripheral vasodilators                                          | 2   | 0.1%    | Arlidin 6mg Tab, Niodan Time Release 500mg Tab Er                                                              |
| C05 | Vasoprotectives                                                  | 7   | 0.3%    | Proctodan Hc 10mg, 20mg, 10mg Sup, Rectogel Hc                                                                 |

|     |                                                                     |     |       |                                                                                                               |
|-----|---------------------------------------------------------------------|-----|-------|---------------------------------------------------------------------------------------------------------------|
| C07 | Beta blocking agents                                                | 70  | 3.2%  | Apo Bisoprolol 10mg Tab, Apo Carvedilol 6.25mg Tab, Inderal La 120mg Cap Er                                   |
| C08 | Calcium channel blockers                                            | 54  | 2.4%  | Apo Verap Sr 120mg Tab Er, Diltiazem Cd 120mg Cap Er, Diltiazem Cd 240mg Cap Er                               |
| C09 | Agents acting on the renin-angiotensin system                       | 203 | 9.2%  | Altace Hct 10mg, 25mg Tab, Apo Cilazapril/Hctz 5mg, 12.5mg Tab, Jamp Candesartan 8mg Tab                      |
| C10 | Lipid modifying agents                                              | 86  | 3.9%  | Apo Lovastatin 40mg Tab, Gd Amlodipine/Atorvastatin 5mg, 10mg Tab, Pms Amlodipine Atorvastatin 10mg, 10mg Tab |
| D   | Dermatologicals                                                     | 69  | 3.1%  |                                                                                                               |
| D01 | Antifungals for dermatological use                                  | 7   | 0.3%  | Ketoderm 2% Crm, Taro Ciclopirox 8% Sol, Terbinafine 250mg Tab                                                |
| D06 | Antibiotics and chemotherapeutics for dermatological use            | 8   | 0.4%  | Noritrate 1% Crm, Podofilm 250mg/MI Sol, Soframycin Skin 50mcg/G, 15mg/G Ointment                             |
| D07 | Corticosteroids, dermatological preparations                        | 39  | 1.8%  | Lyderm 0.05% Ointment, Rolene Lotion 0.05%, Topactin Emollient Cream 0.05% 0.05%                              |
| D09 | Medicated dressings                                                 | 1   | <0.1% | Sofra Tulle 1% Dressing                                                                                       |
| D10 | Anti-acne preparations                                              | 11  | 0.5%  | Clarus 10mg Cap, Clarus 40mg Cap, Retin A 0.025% Gel                                                          |
| D11 | Other dermatological preparations                                   | 3   | 0.1%  | Lustra-Af, Propecia 1mg                                                                                       |
| G   | Genito-urinary system and sex hormones                              | 111 | 5.0%  |                                                                                                               |
| G01 | Gynecological antiinfectives and antiseptics                        | 5   | 0.2%  | Dalacin Vaginal 20mg/G Crm, Flagyl 10% Crm, Flagystatin 22222.22u/G, 111.11mg/G Crm                           |
| G02 | Other gynecologicals                                                | 4   | 0.2%  | Dostinex 0.5mg Tab, Norprolac 0.025mg Tab, Norprolac 0.05mg Tab                                               |
| G03 | Sex hormones and modulators of the genital system                   | 44  | 2.0%  | Brevicon 0.5/35 0.5mg, 0.035mg Tab, Divigel 0.1% Gel, Estalis 2.7mg, 0.62mg Patch Er                          |
| G04 | Urologicals                                                         | 58  | 2.6%  | Levitra, Pms Terazosin 2mg Tab, Pms Terazosin 5mg Tab                                                         |
| H   | Systemic hormonal preparations, excluding sex hormones and insulins | 37  | 1.7%  |                                                                                                               |
| H01 | Pituitary and hypothalamic hormones and analogues                   | 10  | 0.5%  | Cetrotide, Orgalutran 500mcg/MI                                                                               |
| H02 | Corticosteroids for systemic use                                    | 20  | 0.9%  | Apo Prednisone 50mg Tab, Pms Dexamethasone 0.1mg/MI Sol, Pms Dexamethasone Sod Phosphate Inj 10mg/MI Sol      |
| H03 | Thyroid therapy                                                     | 6   | 0.3%  | Apo Methimazole 5mg Tab, Cytomel 5mcg Tab, Eltroxin 200mcg Tab                                                |
| H05 | Calcium homeostasis                                                 | 1   | <0.1% | Calcimar Inj 200u/MI Sol                                                                                      |
| J   | Anti-infectives for systemic use                                    | 244 | 11.0% |                                                                                                               |
| J01 | Antibacterials for systemic use                                     | 165 | 7.5%  | Amoxi-Clav 875mg, Apo Cefaclor 75mg/MI Pdr, Erythro S 500mg Tab                                               |

|     |                                              |     |       |                                                                                                 |
|-----|----------------------------------------------|-----|-------|-------------------------------------------------------------------------------------------------|
| J02 | Antimycotics for systemic use                | 11  | 0.5%  | Apo Voriconazole 50mg Tab, Pms Fluconazole 100mg Tab, Posanol 40mg/MI Susp                      |
| J04 | Antimycobacterials                           | 4   | 0.2%  | Rofact 150mg Cap, Rofact 300mg Cap                                                              |
| J05 | Antivirals for systemic use                  | 33  | 1.5%  | Apo Acyclovir 400mg Tab, Apo Acyclovir 800mg Tab, Apo Famciclovir 125mg Tab                     |
| J06 | Immune sera and immunoglobulins              | 1   | <0.1% | Imogam Rabies Pasteurized                                                                       |
| J07 | Vaccines                                     | 30  | 1.4%  | Avaxim, Havrix 720 Junior, Rabavert                                                             |
| L   | Antineoplastic and immunomodulating agents   | 89  | 4.0%  |                                                                                                 |
| L01 | Antineoplastic agents                        | 56  | 2.5%  | Docetaxel Injection, Fludarabine Phosphate For Injection, Leukeran 2mg Tab                      |
| L02 | Endocrine therapy                            | 18  | 0.8%  | Apo Bicalutamide 50mg Tab, Casodex 50mg Tab, Pms Anastrozole 1mg Tab                            |
| L03 | Immunostimulants                             | 4   | 0.2%  | Intron A 15000000u/MI Sol, Intron A 25000000u/MI Sol, Intron A 50000000u/MI Sol                 |
| L04 | Immunosuppressants                           | 11  | 0.5%  | Apo Leflunomide 10mg Tab, Sandoz Cyclosporine 100mg Cap, Sandoz Mycophenolate Mofetil 250mg Cap |
| M   | Musculoskeletal system                       | 88  | 4.0%  |                                                                                                 |
| M01 | Antiinflammatory and antirheumatic products  | 48  | 2.2%  | Apo Indomethacin 25mg Cap, Apo Naproxen Ec 500mg Tab Dr, Sandoz Diclofenac Sr 75mg Tab Er       |
| M02 | Topical products for joint and muscular pain | 1   | <0.1% | Zuacta                                                                                          |
| M03 | Muscle relaxants                             | 13  | 0.6%  | Dantrium 25mg Cap, Pal Tizanidine 4mg Tab, Pms Baclofen 20mg Tab                                |
| M04 | Antigout preparations                        | 2   | 0.1%  | Sulfinpyrazone 200mg Tab                                                                        |
| M05 | Drugs for treatment of bone diseases         | 24  | 1.1%  | Etidrocal 400mg, 500mg Tab, Fosavance 70mg, 5600unit Tab, Mylan Alendronate 70mg Tab            |
| N   | Nervous system                               | 710 | 32.1% |                                                                                                 |
| N01 | Anesthetics                                  | 3   | 0.1%  | Suprane                                                                                         |
| N02 | Analgesics                                   | 132 | 6.0%  | Apo Almotriptan 6.25mg Tab, Apo Sumatriptan 100mg Tab, Pms Fentanyl Mtx 100mcg Patch Er         |
| N03 | Antiepileptics                               | 126 | 5.7%  | Apo Levetiracetam 750mg Tab, Divalproex 125mg Tab Dr, Lamictal 150mg Tab                        |
| N04 | Anti-parkinson drugs                         | 52  | 2.4%  | Bromocriptine 5mg Cap, Pms Pramipexole 1mg Tab, Pramipexole 0.25mg Tab                          |
| N05 | Psycholeptics                                | 202 | 9.1%  | Olanzapine 5mg Tab Od, Oxpan 15mg Tab, Pms Olanzapine 5mg Tab                                   |
| N06 | Psychoanaleptics                             | 179 | 8.1%  | Levate 75mg Tab, Mar Galantamine Er 24mg Cap Er, Parnate 10mg Tab                               |
| N07 | Other nervous system drugs                   | 16  | 0.7%  | Apo Tetrabenazine 25mg Tab, Duvoid 25mg Tab, Metadol 10mg Tab                                   |

|     |                                                     |     |       |                                                                                                                  |
|-----|-----------------------------------------------------|-----|-------|------------------------------------------------------------------------------------------------------------------|
| P   | Antiparasitic products, insecticides and repellents | 6   | 0.3%  |                                                                                                                  |
| P01 | Antiprotozoals                                      | 5   | 0.2%  | Apo Quinine 200mg Cap, Apo Quinine 300mg Cap, Mepron 150mg/ML Susp                                               |
| P02 | Anthelmintics                                       | 1   | <0.1% | Biltricide 600mg Tab                                                                                             |
| R   | Respiratory system                                  | 79  | 3.6%  |                                                                                                                  |
| R01 | Nasal preparations                                  | 12  | 0.5%  | Apo Mometasone 50mcg/Act Spray Md, Mylan Beclio Aq 50mcg/Act Md Aero, Mylan Budesonide Aq 64mcg/Act Spray Md     |
| R03 | Drugs for obstructive airway diseases               | 57  | 2.6%  | Aminophylline Inj 50mg/ML, Apo Salvent 100mcg/Act Md Aero, Pms Ipratropium 125mcg/ML Sol                         |
| R05 | Cough and cold preparations                         | 6   | 0.3%  | Dalmacol Syrup, Tussionex 10mg, 5mg Tab Er, Tussionex 2mg/ML, 1mg/ML Susp                                        |
| R06 | Antihistamines for systemic use                     | 3   | 0.1%  | Panectyl 2.5mg Tab, Pms Cetirizine 20mg Tab                                                                      |
| R07 | Other respiratory system products                   | 1   | <0.1% | Survanta                                                                                                         |
| S   | Sensory organs                                      | 105 | 4.7%  |                                                                                                                  |
| S01 | Ophthalmologicals                                   | 101 | 4.6%  | Chloramphenicol 1% Ointment, Gentamicin 0.3% Sol, Nevanac 0.1% Susp                                              |
| S02 | Otologicals                                         | 1   | <0.1% | Odan Spor Hc 10mg/ML, 1.19mg/ML, 3.5mg/ML Susp                                                                   |
| S03 | Ophthalmological and otological preparations        | 3   | 0.1%  | Dexamethasone 0.1% Sol, Odan Dexamethasone 0.1% Sol, Sofracort Sterile Ear/Eye 0.5mg/ML, 5mg/ML, 0.05mg/ML Sol   |
| V   | Various                                             | 20  | 0.9%  |                                                                                                                  |
| V01 | Allergens                                           | 6   | 0.3%  | Pharmalgen Honey Bee Venom 120mcg Pdr Sol, Pharmalgen Wasp Venom Protein, Pharmalgen Yellow Hornet Venom Protein |
| V03 | All other therapeutic products                      | 12  | 0.5%  | Fasturtec, Fosrenol 250mg Tab (Chewable), Leucovorin Calcium Injection Usp                                       |
| V04 | Diagnostic agents                                   | 2   | 0.1%  | Relefact Trh Injection 200mcg/ML 200mcg/ML, Tubersol 50tu/ML Sol                                                 |

### Supplementary Table 3. Data exploration of DIN age and the cut-off value determination for categorization

We first calculated the probability of being in shortage by the DIN age in 1- year increment for those  $\leq 5$  years and 5-year increment for those over 5 and examined if it is reasonable to model the relationship as linear. Based on the results shown below, it was decided to model the DIN age as a continuous variable for branded DINs and dichotomize the variable at 3 years for generic DINs. Also, the new pan-Canadian tiered pricing framework was implemented on April 1, 2014 for new generic drugs (<http://formulary.drugplan.ehealthsask.ca/PanCanadianGenerics>), which was about 3 years before the start of our study period.

| DIN age | Branded |                   | Generic |                   |
|---------|---------|-------------------|---------|-------------------|
|         | Total   | N (%) in shortage | Total   | N (%) in shortage |
| 1:<1    | 97      | 2 (2.1%)          | 304     | 24 (7.9%)         |
| 2:1-2   | 77      | 2 (2.6%)          | 385     | 66 (17.1%)        |
| 3:2-3   | 76      | 4 (5.3%)          | 465     | 103 (22.2%)       |
| 4:3-4   | 94      | 7 (7.4%)          | 508     | 184 (36.2%)       |
| 5:4-5   | 63      | 10 (15.9%)        | 691     | 206 (29.8%)       |
| 6:5-10  | 343     | 54 (15.7%)        | 1553    | 419 (27.0%)       |
| 7:10-15 | 320     | 49 (15.3%)        | 867     | 270 (31.1%)       |
| 8:15-25 | 802     | 168 (20.9%)       | 1145    | 319 (27.9%)       |
| 9:>25   | 450     | 130 (28.9%)       | 609     | 139 (22.8%)       |



**Supplementary Table 4. Manufacturer characteristics and drug shortage status among those with at least 5 DINs in shortages**

| <b>Manufacturer</b>                          | <b>Total N. of DINs</b> | <b>% of branded DINs</b> | <b>Total N of markets</b> | <b>N of DINs in shortage</b> | <b>% of DINs in shortage</b> | <b>Shortage Days: Mean (SD)</b> | <b>Shortage Days: Median (Q1, Q3)</b> |
|----------------------------------------------|-------------------------|--------------------------|---------------------------|------------------------------|------------------------------|---------------------------------|---------------------------------------|
| Apotex Inc.                                  | 748                     | 0.0%                     | 718                       | 410                          | 54.8%                        | 176.5 (135.5)                   | 143.0 (88.0, 221.0)                   |
| Pharmascience Inc.                           | 659                     | 1.5%                     | 604                       | 257                          | 39.0%                        | 237.5 (171.3)                   | 200.0 (91.0, 376.0)                   |
| Teva Canada Ltd.                             | 827                     | 2.2%                     | 738                       | 161                          | 19.5%                        | 198.6 (181.5)                   | 132.0 (59.0, 338.0)                   |
| Mylan Pharmaceuticals Ulc.                   | 320                     | 0.3%                     | 312                       | 158                          | 49.4%                        | 93.1 (97.9)                     | 71.5 (21.0, 126.0)                    |
| Sandoz Canada Incorporated.                  | 567                     | 0.7%                     | 529                       | 124                          | 21.9%                        | 104.4 (90.5)                    | 72.0 (42.0, 137.5)                    |
| Marcan Pharmaceuticals Inc.                  | 109                     | 0.0%                     | 109                       | 65                           | 59.6%                        | 267.8 (162.3)                   | 239.0 (134.0, 439.0)                  |
| Pro Doc Ltée                                 | 361                     | 0.3%                     | 357                       | 60                           | 16.6%                        | 112.6 (109.8)                   | 75.5 (22.5, 183.0)                    |
| Pfizer Canada Inc.                           | 280                     | 83.7%                    | 256                       | 59                           | 21.1%                        | 84.3 (89.6)                     | 40.0 (23.0, 141.0)                    |
| Glaxosmithkline Inc.                         | 126                     | 100.0%                   | 124                       | 54                           | 42.9%                        | 137.2 (135.5)                   | 97.5 (23.0, 222.0)                    |
| Valeant Canada Lp<br>Valeant Canada S. E. C. | 159                     | 83.6%                    | 139                       | 53                           | 33.3%                        | 97.6 (103.7)                    | 66.0 (21.0, 154.0)                    |
| Jamp Pharma Corporation                      | 220                     | 0.0%                     | 205                       | 48                           | 21.8%                        | 188.6 (141.3)                   | 144.0 (83.0, 226.0)                   |
| Merck Canada Inc.                            | 141                     | 100.0%                   | 136                       | 47                           | 33.3%                        | 64.9 (63.7)                     | 50.0 (14.0, 90.0)                     |
| Sanis Health Inc.                            | 273                     | 0.0%                     | 270                       | 47                           | 17.2%                        | 102.2 (96.4)                    | 65.0 (26.0, 145.0)                    |
| Sivem Pharmaceuticals Ulc.                   | 210                     | 0.0%                     | 200                       | 46                           | 21.9%                        | 165.7 (120.7)                   | 142.5 (57.0, 284.0)                   |
| AA Pharma Inc.                               | 147                     | 17.0%                    | 142                       | 33                           | 22.4%                        | 107.5 (134.8)                   | 59.0 (19.0, 136.0)                    |
| Laboratoire Riva Inc.                        | 200                     | 1.5%                     | 194                       | 31                           | 15.5%                        | 182.3 (156.8)                   | 113.0 (95.0, 245.0)                   |
| Ranbaxy Pharmaceuticals Canada Inc.          | 182                     | 0.0%                     | 181                       | 31                           | 17.0%                        | 199.0 (185.2)                   | 107.0 (52.0, 420.0)                   |
| Vanc Pharmaceuticals Inc.                    | 67                      | 0.0%                     | 67                        | 30                           | 44.8%                        | 119.1 (41.0)                    | 105.0 (102.0, 106.0)                  |
| Paladin Labs Inc.                            | 72                      | 95.8%                    | 69                        | 28                           | 38.9%                        | 196.5 (174.0)                   | 133.0 (43.5, 341.0)                   |
| Sanofi-Aventis Canada Inc.                   | 111                     | 100.0%                   | 98                        | 28                           | 25.2%                        | 85.8 (108.2)                    | 37.0 (26.5, 115.0)                    |
| Novartis Pharmaceuticals Canada Inc.         | 193                     | 97.3%                    | 187                       | 27                           | 14.0%                        | 85.3 (122.3)                    | 34.0 (20.0, 127.0)                    |
| BGP Pharma Ulc.                              | 59                      | 100.0%                   | 57                        | 23                           | 39.0%                        | 83.7 (124.1)                    | 33.0 (14.0, 124.0)                    |
| Actavis Pharma Company                       | 224                     | 0.0%                     | 223                       | 22                           | 9.8%                         | 153.3 (127.7)                   | 135.0 (45.0, 259.0)                   |
| Pendopharm Inc.                              | 56                      | 41.1%                    | 56                        | 22                           | 39.3%                        | 191.0 (170.2)                   | 127.5 (47.0, 315.0)                   |

|                                         |     |        |     |    |       |               |                      |
|-----------------------------------------|-----|--------|-----|----|-------|---------------|----------------------|
| Odan Laboratories Ltd.                  | 42  | 2.4%   | 41  | 21 | 50.0% | 110.1 (72.2)  | 100.0 (100.0, 100.0) |
| Auro Pharma Inc.                        | 177 | 0.0%   | 177 | 19 | 10.7% | 105.9 (151.3) | 49.0 (42.0, 87.0)    |
| Eberth Pharmaceuticals Inc.             | 20  | 15.0%  | 20  | 18 | 90.0% | 276.2 (192.2) | 126.0 (126.0, 454.0) |
| Taro Pharmaceutical Inc.                | 75  | 0.0%   | 74  | 18 | 24.0% | 101.1 (133.8) | 39.5 (29.0, 90.0)    |
| Biomed Pharma                           | 75  | 16.0%  | 65  | 17 | 22.7% | 169.9 (124.7) | 143.0 (143.0, 143.0) |
| Mint Pharmaceuticals Inc.               | 129 | 0.0%   | 123 | 17 | 13.2% | 90.3 (69.3)   | 58.0 (38.0, 117.0)   |
| Erfa Canada 2012 Inc.                   | 38  | 97.4%  | 37  | 16 | 42.1% | 110.8 (44.6)  | 132.0 (103.0, 132.0) |
| Accord Healthcare Inc.                  | 72  | 0.0%   | 69  | 15 | 20.8% | 95.3 (73.2)   | 77.0 (42.0, 115.0)   |
| Sanofi Pasteur Limited                  | 26  | 100.0% | 25  | 14 | 53.8% | 187.6 (159.2) | 160.0 (57.0, 310.0)  |
| Sterimax Inc.                           | 64  | 3.1%   | 64  | 13 | 20.3% | 135.4 (129.5) | 64.0 (43.0, 218.0)   |
| Bayer Inc.                              | 66  | 100.0% | 61  | 11 | 16.7% | 93.9 (65.4)   | 75.0 (44.0, 127.0)   |
| Boehringer Ingelheim (Canada) Ltd.      | 50  | 100.0% | 50  | 11 | 22.0% | 64.8 (42.5)   | 59.0 (25.0, 104.0)   |
| Fresenius Kabi Canada Ltd.              | 67  | 3.0%   | 66  | 10 | 14.9% | 154.8 (140.0) | 110.0 (41.0, 237.0)  |
| Astrazeneca Canada Inc.                 | 89  | 100.0% | 89  | 9  | 10.1% | 86.6 (79.4)   | 45.0 (31.0, 168.0)   |
| Baxter Corporation                      | 25  | 66.7%  | 24  | 9  | 36.0% | 66.0 (59.7)   | 43.0 (20.0, 144.0)   |
| Aspen Pharmacare                        | 29  | 85.0%  | 20  | 8  | 27.6% | 85.5 (53.5)   | 84.0 (39.0, 127.0)   |
| Pfizer Canada Ulc                       | 53  | 74.2%  | 53  | 8  | 15.1% | 62.0 (43.8)   | 48.5 (26.5, 94.0)    |
| Hospira Healthcare Corporation          | 65  | 9.2%   | 60  | 7  | 10.8% | 104.0 (76.8)  | 83.0 (37.0, 190.0)   |
| Omega Laboratories Ltd.                 | 51  | 0.0%   | 44  | 7  | 13.7% | 270.9 (217.2) | 285.0 (22.0, 500.0)  |
| Alk - Abello A/S                        | 31  | 100.0% | 31  | 6  | 19.4% | 538.3 (13.4)  | 547.0 (521.0, 547.0) |
| Bristol-Myers Squibb Canada             | 71  | 100.0% | 69  | 5  | 7.0%  | 47.0 (29.4)   | 35.0 (32.0, 67.0)    |
| Genmed A Division Of Pfizer Canada Inc. | 35  | 0.0%   | 35  | 5  | 14.3% | 148.8 (180.1) | 37.0 (34.0, 226.0)   |
| Purdue Pharma                           | 70  | 100.0% | 68  | 5  | 7.1%  | 32.6 (10.6)   | 31.0 (23.0, 42.0)    |

**Supplementary Table 5. Shortage by reported reasons at the DIN level**

| <b>Reason(s)</b>                                                                                                           | <b>N</b> | <b>Percent</b> |
|----------------------------------------------------------------------------------------------------------------------------|----------|----------------|
| disruption of the manufacture                                                                                              | 1266     | 57.3%          |
| delay in shipping                                                                                                          | 323      | 14.6%          |
| demand increase                                                                                                            | 146      | 6.6%           |
| requirements related to complying with good manufacturing practices                                                        | 75       | 3.4%           |
| not provided                                                                                                               | 72       | 3.3%           |
| shortage of ingredient                                                                                                     | 65       | 2.9%           |
| business or economic reasons                                                                                               | 43       | 1.9%           |
| insufficient supply                                                                                                        | 36       | 1.6%           |
| delay in shipping   disruption of the manufacture                                                                          | 32       | 1.4%           |
| delay in shipping   demand increase                                                                                        | 28       | 1.3%           |
| disruption of the manufacture   demand increase                                                                            | 26       | 1.2%           |
| delay in shipping   requirements related to complying with good manufacturing practices                                    | 17       | 0.8%           |
| disruption of the manufacture   shortage of ingredient                                                                     | 16       | 0.7%           |
| other                                                                                                                      | 11       | 0.5%           |
| demand increase   requirements related to complying with good manufacturing practices                                      | 6        | 0.3%           |
| disruption of the manufacture   not provided                                                                               | 5        | 0.2%           |
| delay in shipping   disruption of the manufacture   demand increase                                                        | 5        | 0.2%           |
| disruption of the manufacture   requirements related to complying with good manufacturing practices                        | 4        | 0.2%           |
| delay in shipping   other   not provided                                                                                   | 4        | 0.2%           |
| business or economic reasons   disruption of the manufacture                                                               | 3        | 0.1%           |
| requirements related to complying with good manufacturing practices   other   not provided                                 | 3        | 0.1%           |
| demand increase   shortage of ingredient                                                                                   | 3        | 0.1%           |
| delay in shipping   shortage of ingredient                                                                                 | 3        | 0.1%           |
| delay in shipping   demand increase   requirements related to complying with good manufacturing practices                  | 2        | 0.1%           |
| delay in shipping   insufficient supply                                                                                    | 2        | 0.1%           |
| requirements related to complying with good manufacturing practices   other                                                | 1        | <0.1%          |
| demand increase   not provided                                                                                             | 1        | <0.1%          |
| demand increase   insufficient supply                                                                                      | 1        | <0.1%          |
| demand increase   insufficient supply   requirements related to complying with good manufacturing practices                | 1        | <0.1%          |
| disruption of the manufacture   requirements related to complying with good manufacturing practices   other   not provided | 1        | <0.1%          |
| disruption of the manufacture   demand increase   shortage of ingredient                                                   | 1        | <0.1%          |

|                                                                                                                                           |   |       |
|-------------------------------------------------------------------------------------------------------------------------------------------|---|-------|
| disruption of the manufacture   shortage of ingredient   not provided                                                                     | 1 | <0.1% |
| disruption of the manufacture   other   not provided                                                                                      | 1 | <0.1% |
| disruption of the manufacture   insufficient supply                                                                                       | 1 | <0.1% |
| shortage of ingredient   not provided                                                                                                     | 1 | <0.1% |
| shortage of ingredient   other   not provided                                                                                             | 1 | <0.1% |
| delay in shipping   disruption of the manufacture   demand increase   requirements related to complying with good manufacturing practices | 1 | <0.1% |
| delay in shipping   not provided                                                                                                          | 1 | <0.1% |
| insufficient supply   other   not provided                                                                                                | 1 | <0.1% |

Business or economic reasons: discontinuation, deactivation etc.; other: include “on allocation” and the ones we could not categorize; not provided: the ones without any comments
