# Supplementary material
Source: PubMed Central journal article supplement (PMC7641197)

**Appendices (as supplied by the author)**

**Appendix 3. Distribution of shortage duration at the DIN level**

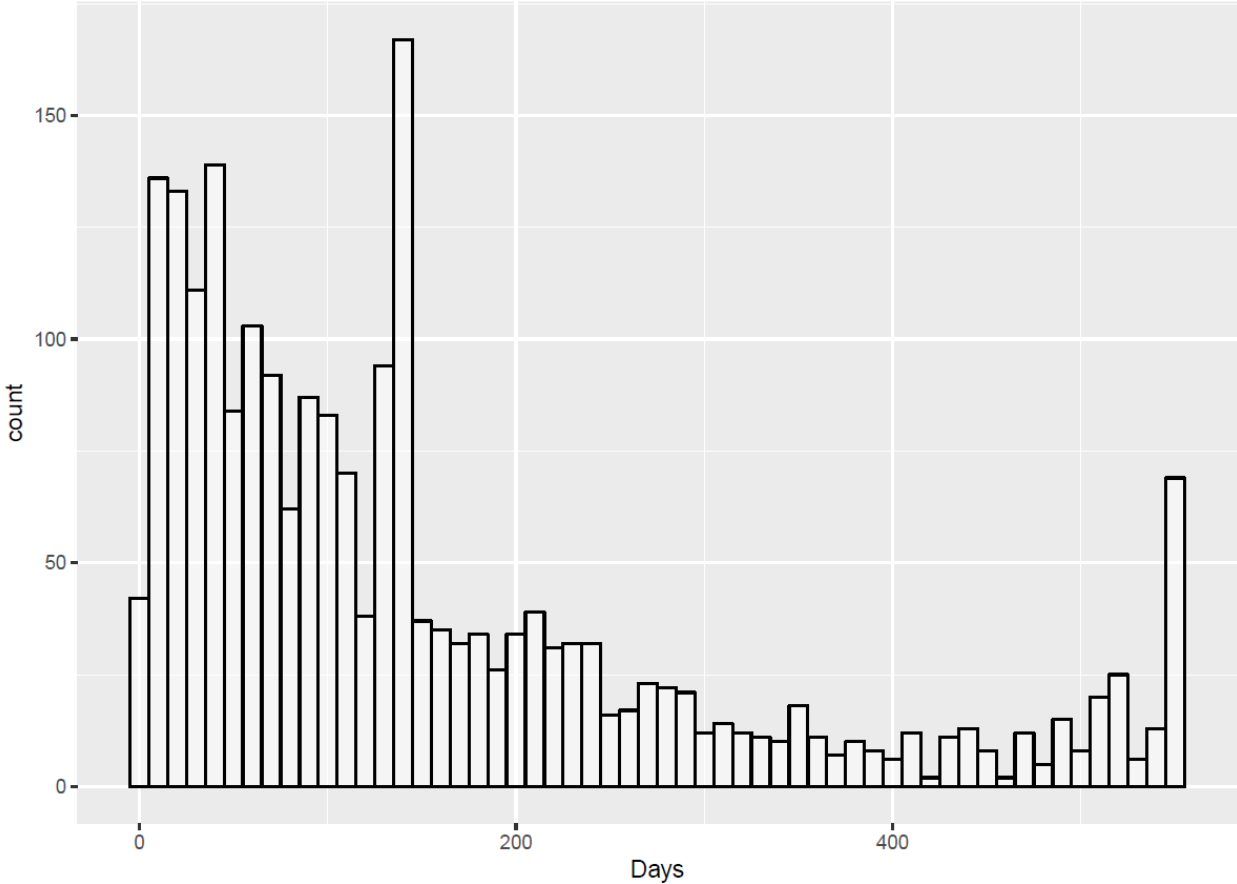

Supplement: supp_8.3.E535_2020-0036-3-at.pdf [file supp_8.3.E535_2020-0036-3-at.pdf]
