# Supplementary material
Source: PubMed Central journal article supplement (PMC7641197)
Supplement: supp_8.3.E535_2020-0036-4-at.pdf [file supp_8.3.E535_2020-0036-4-at.pdf]

## Appendices (as supplied by the author)

### Appendix 4. Basic description of shortages

Our analysis consisted of 3,470 markets (9,472 DINs including 2,322 branded DINs, 6,527 generic DINs and 623 biologic DINs) (flow diagram in Supplementary Figure 1). These DINs were prescription DINs that have been actively marketed prior to March 14, 2017 and have non-missing information on dosage form in Canada. About 13.3% markets (n=462) were reported in shortage and their average number of days in shortage was 136.6 (standard deviation (SD): 149.2) during our study period (Supplementary Table 1). Markets with a single generic manufacturer (n=124, 27.35%), “other complex route/form” (n=120, 22.3%) and “oral non-solid” (n=44, 23.3%), or for sensory organs (n=47, 34.1%) had a higher probability of being in shortage.

Among all 9,472 DINs, 2,212 (23.4%) DINs were reported in shortage and their average number of days in shortage was 155.3 (SD: 146.2). Generic DINs had a higher probability of being in shortage and longer shortage duration than branded DINs (n=1,730 (26.5%) vs. 426 (18.3%) in shortage ( $p<0.01$ ) and 167.6 (SD: 149.1) vs. 99.9 (SD: 111.7) days ( $p<0.01$ ), Supplementary Table 1). DINs in markets with branded manufacturers and a single manufacturer (34.1% for generic DINs and 27.2% for branded DINs), with “other complex route/form” (35.6% and 25.1%), older age (28.6% and 20.2%), large manufacturers (27.7% and 22.6%), and for sensory organs (45.3% and 37.2%) had a higher probability of being in shortage.

**Supplementary Figure 1. Flow diagram of final study market and drug selection**

DIN: drug identification number; “Ethical” products are those that do not require a prescription but are generally prescribed by medical practitioner for unscheduled professional use (e.g., hemodialysis solution) and emergency use (e.g., nitroglycerine)<sup>4</sup>; A “market” is a group of DINs with the same active ingredients, dosage form, route of administration and strength.

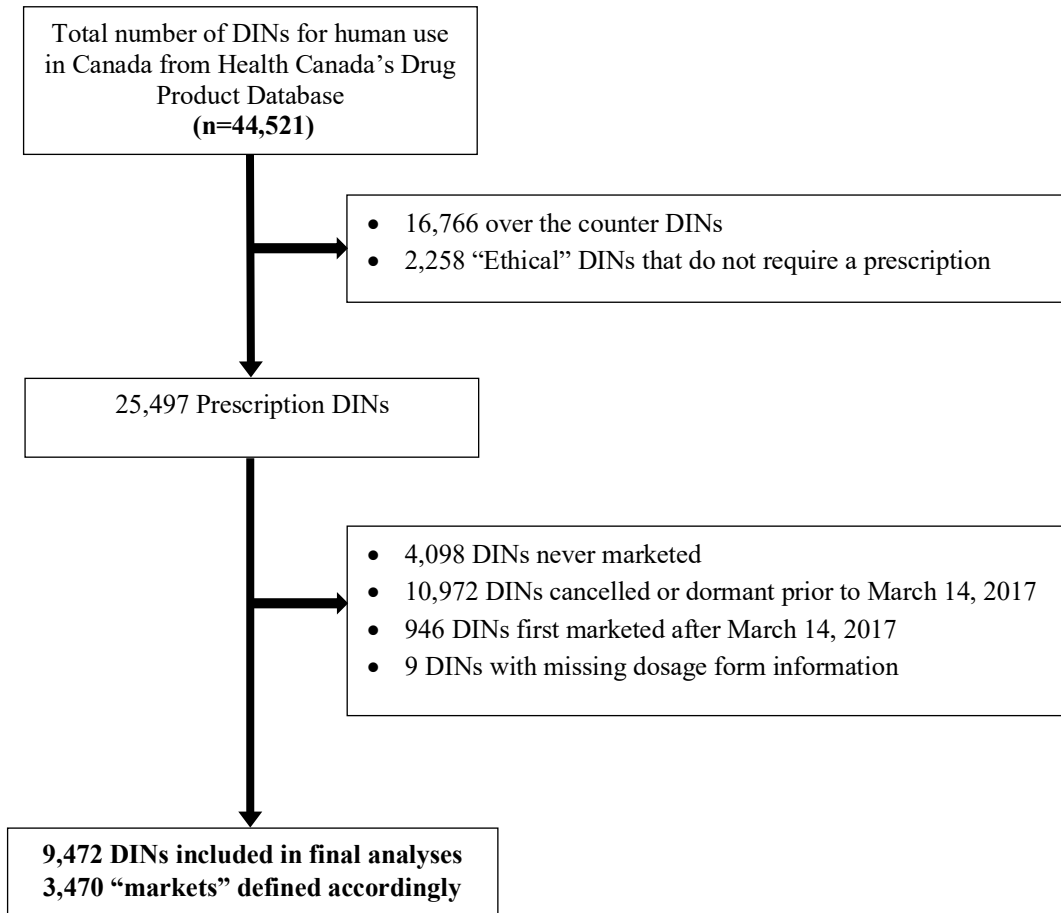

**Supplementary Table 1. Markets and DINs in shortage and shortage duration**

| Variable                          | Markets |                           |                                   | Branded DINs |                  |                                   | Generic DINs |                  |                                   |
|-----------------------------------|---------|---------------------------|-----------------------------------|--------------|------------------|-----------------------------------|--------------|------------------|-----------------------------------|
|                                   | Total N | Markets in Shortage N (%) | Shortage Duration* Mean Days (SD) | Total N      | DINs in Shortage | Shortage Duration* Mean Days (SD) | Total N      | DINs in Shortage | Shortage Duration* Mean Days (SD) |
| All                               | 3470    | 462 (13.3%)               | 136.6 (149.2)                     | 2322         | 426 (18.3%)      | 99.9 (111.7)                      | 6527         | 1730 (26.5%)     | 167.6 (149.1)                     |
| Market structure                  |         |                           |                                   |              |                  |                                   |              |                  |                                   |
| B/G Single                        | 208     | 31 (14.9%)                | 134.5 (131.2)                     | 235          | 64 (27.2%)       | 120.4 (124.7)                     | 214          | 73 (34.1%)       | 163.2 (160.9)                     |
| B/G Multiple                      | 620     | 13 (2.1%)                 | 126.5 (142.3)                     | 681          | 131 (19.2%)      | 100.0 (109.9)                     | 4423         | 1169 (26.4%)     | 162.5 (144.9)                     |
| G single                          | 454     | 124 (27.3%)               | 187.2 (169.2)                     |              |                  |                                   | 464          | 127 (27.4%)      | 188.2 (169.3)                     |
| G multiple                        | 387     | 36 (9.3%)                 | 130.0 (158.1)                     |              |                  |                                   | 1426         | 361 (25.3%)      | 177.9 (152.2)                     |
| BIO                               | 484     | 49 (10.1%)                | 192.1 (184.6)                     |              |                  |                                   |              |                  |                                   |
| B only                            | 1317    | 209 (15.9%)               | 95.6 (112.7)                      | 1406         | 231 (16.4%)      | 94.1 (108.7)                      |              |                  |                                   |
| Route form                        |         |                           |                                   |              |                  |                                   |              |                  |                                   |
| Injection                         | 991     | 119 (12.0%)               | 168.5 (170.3)                     | 323          | 59 (18.3%)       | 105.3 (108.1)                     | 640          | 151 (23.6%)      | 181.8 (163.1)                     |
| Oral non-solid                    | 189     | 44 (23.3%)                | 159.4 (170.8)                     | 123          | 23 (18.7%)       | 108.6 (123.2)                     | 134          | 40 (29.9%)       | 188.4 (164.7)                     |
| Oral solid regular release        | 1513    | 154 (10.2%)               | 132.6 (149.8)                     | 1195         | 198 (16.6%)      | 104.3 (119.2)                     | 4789         | 1239 (25.9%)     | 165.3 (145.7)                     |
| Oral solid special release        | 238     | 25 (10.5%)                | 84.0 (108.8)                      | 254          | 39 (15.4%)       | 75.2 (108.3)                      | 526          | 144 (27.4%)      | 179.6 (160.0)                     |
| Other                             | 539     | 120 (22.3%)               | 112.5 (115.1)                     | 427          | 107 (25.1%)      | 95.8 (97.9)                       | 438          | 156 (35.6%)      | 156.0 (147.4)                     |
| Essential medicine                |         |                           |                                   |              |                  |                                   |              |                  |                                   |
| No                                | 2981    | 388 (13.0%)               | 136.5 (149.0)                     | 1945         | 361 (18.6%)      | 103.3 (114.7)                     | 4923         | 1277 (25.9%)     | 167.5 (149.6)                     |
| Yes                               | 489     | 74 (15.1%)                | 137.2 (151.1)                     | 377          | 65 (17.2%)       | 80.9 (91.5)                       | 1604         | 453 (28.2%)      | 167.9 (147.9)                     |
| On formulary <sup>a</sup>         |         |                           |                                   |              |                  |                                   |              |                  |                                   |
| No                                | 878     | 107 (12.2%)               | 153.6 (168.0)                     | 512          | 83 (16.2%)       | 116.8 (131.7)                     | 1171         | 222 (19.0%)      | 154.8 (142.6)                     |
| Yes                               | 2592    | 355 (13.7%)               | 131.5 (142.9)                     | 1810         | 343 (19.0%)      | 95.8 (106.1)                      | 5356         | 1508 (28.2%)     | 169.5 (150.0)                     |
| DIN Age                           |         |                           |                                   |              |                  |                                   |              |                  |                                   |
| <3 years                          |         |                           |                                   | 250          | 8 (3.2%)         | 102.4 (105.7)                     | 1154         | 193 (16.7%)      | 183.1 (153.7)                     |
| ≥3 years                          |         |                           |                                   | 2072         | 418 (20.2%)      | 99.8 (111.9)                      | 5373         | 1537 (28.6%)     | 165.7 (148.5)                     |
| Top 50 manufacturers <sup>b</sup> |         |                           |                                   |              |                  |                                   |              |                  |                                   |
| No                                |         |                           |                                   | 520          | 85 (16.3%)       | 119.2 (105.8)                     | 1942         | 358 (18.4%)      | 173.7 (149.1)                     |
| Yes                               |         |                           |                                   | 1802         | 341 (18.9%)      | 95.1 (112.8)                      | 4585         | 1372 (29.9%)     | 166.1 (149.2)                     |
| Manufacturer size <sup>c</sup>    |         |                           |                                   |              |                  |                                   |              |                  |                                   |
| Small                             |         |                           |                                   | 731          | 78 (10.7%)       | 115.8 (111.3)                     | 322          | 43 (13.4%)       | 189.6 (186.8)                     |
| Medium                            |         |                           |                                   | 682          | 143 (21.0%)      | 112.4 (128.3)                     | 636          | 146 (23.0%)      | 135.6 (119.5)                     |
| Large                             |         |                           |                                   | 909          | 205 (22.6%)      | 85.0 (97.1)                       | 5569         | 1541 (27.7%)     | 170.1 (150.2)                     |

| Variable                                                            | Markets |                           |                                   | Branded DINs |                  |                                   | Generic DINs |                  |                                   |
|---------------------------------------------------------------------|---------|---------------------------|-----------------------------------|--------------|------------------|-----------------------------------|--------------|------------------|-----------------------------------|
|                                                                     | Total N | Markets in Shortage N (%) | Shortage Duration* Mean Days (SD) | Total N      | DINs in Shortage | Shortage Duration* Mean Days (SD) | Total N      | DINs in Shortage | Shortage Duration* Mean Days (SD) |
| Interaction of manufacturer size and top 50 manufacturer            |         |                           |                                   |              |                  |                                   |              |                  |                                   |
| large, top50=No                                                     |         |                           |                                   |              |                  |                                   | 1096         | 201 (18.3%)      | 191.9 (155.0)                     |
| large, top50=Yes                                                    |         |                           |                                   |              |                  |                                   | 4473         | 1340 (30.0%)     | 166.8 (149.3)                     |
| medium, top50=No                                                    |         |                           |                                   |              |                  |                                   | 525          | 114 (21.7%)      | 135.6 (112.3)                     |
| medium, top50=Yes                                                   |         |                           |                                   |              |                  |                                   | 111          | 32 (28.8%)       | 135.4 (144.2)                     |
| Small                                                               |         |                           |                                   |              |                  |                                   | 322          | 43 (13.4%)       | 189.6 (186.8)                     |
| Manufacturer type <sup>d</sup>                                      |         |                           |                                   |              |                  |                                   |              |                  |                                   |
| Generic                                                             |         |                           |                                   | 42           | 9 (21.4%)        | 139.0 (82.8)                      | 6080         | 1620 (26.6%)     | 169.1 (149.0)                     |
| Mixed                                                               |         |                           |                                   | 509          | 134 (26.3%)      | 97.7 (110.1)                      | 437          | 108 (24.7%)      | 148.1 (150.4)                     |
| Branded                                                             |         |                           |                                   | 1771         | 283 (16.0%)      | 99.6 (113.3)                      | 10           | 2 (20.0%)        | 46.5 (38.9)                       |
| Interaction of manufacturer type and top 50 manufacturer            |         |                           |                                   |              |                  |                                   |              |                  |                                   |
| Branded=No, Top50=No                                                |         |                           |                                   | 121          | 37 (30.6%)       | 105.4 (92.0)                      |              |                  |                                   |
| Branded=No, Top50=Yes                                               |         |                           |                                   | 430          | 106 (24.7%)      | 98.5 (114.4)                      |              |                  |                                   |
| Branded=Yes, Top50=No                                               |         |                           |                                   | 399          | 48 (12.0%)       | 129.8 (115.1)                     |              |                  |                                   |
| Branded=Yes, Top50=Yes                                              |         |                           |                                   | 1372         | 235 (17.1%)      | 93.5 (112.2)                      |              |                  |                                   |
| Anatomical Therapeutic Chemical Classification (Level 1)            |         |                           |                                   |              |                  |                                   |              |                  |                                   |
| Alimentary tract and metabolism                                     | 276     | 21 (7.6%)                 | 114.5 (118.3)                     | 194          | 26 (13.4%)       | 124.0 (147.7)                     | 486          | 109 (22.4%)      | 200.1 (168.4)                     |
| Blood and blood forming organs                                      | 170     | 6 (3.5%)                  | 69.7 (33.2)                       | 70           | 10 (14.3%)       | 67.6 (48.6)                       | 64           | 8 (12.5%)        | 165.1 (165.1)                     |
| Cardiovascular system                                               | 386     | 50 (13.0%)                | 104.2 (109.5)                     | 294          | 66 (22.4%)       | 99.8 (92.6)                       | 1636         | 432 (26.4%)      | 171.2 (153.0)                     |
| Dermatologicals                                                     | 148     | 25 (16.9%)                | 98.0 (125.5)                      | 140          | 34 (24.3%)       | 94.1 (104.8)                      | 115          | 35 (30.4%)       | 134.6 (122.7)                     |
| Genito-urinary system and sex hormones                              | 192     | 35 (18.2%)                | 101.1 (128.6)                     | 190          | 38 (20.0%)       | 91.8 (119.9)                      | 292          | 69 (23.6%)       | 164.8 (146.7)                     |
| Systemic hormonal preparations, excluding sex hormones and insulins | 162     | 22 (13.6%)                | 152.5 (186.6)                     | 105          | 14 (13.3%)       | 53.1 (40.4)                       | 80           | 22 (27.5%)       | 267.3 (177.6)                     |
| Anti-infectives for systemic use                                    | 452     | 77 (17.0%)                | 175.3 (163.2)                     | 219          | 31 (14.2%)       | 115.8 (120.6)                     | 636          | 182 (28.6%)      | 173.4 (138.3)                     |
| Antineoplastic and immunomodulating agents                          | 361     | 27 (7.5%)                 | 109.9 (113.9)                     | 247          | 23 (9.3%)        | 77.5 (84.1)                       | 270          | 60 (22.2%)       | 134.2 (133.3)                     |
| Musculoskeletal system                                              | 126     | 14 (11.1%)                | 169.1 (166.2)                     | 60           | 16 (26.7%)       | 126.1 (93.0)                      | 358          | 72 (20.1%)       | 130.6 (120.0)                     |
| Nervous system                                                      | 727     | 81 (11.1%)                | 149.5 (154.5)                     | 562          | 102 (18.1%)      | 110.9 (132.9)                     | 2228         | 608 (27.3%)      | 161.4 (143.3)                     |

| Variable                                            | Markets |                           |                                   | Branded DINs |                  |                                   | Generic DINs |                  |                                   |
|-----------------------------------------------------|---------|---------------------------|-----------------------------------|--------------|------------------|-----------------------------------|--------------|------------------|-----------------------------------|
|                                                     | Total N | Markets in Shortage N (%) | Shortage Duration* Mean Days (SD) | Total N      | DINs in Shortage | Shortage Duration* Mean Days (SD) | Total N      | DINs in Shortage | Shortage Duration* Mean Days (SD) |
| Antiparasitic products, insecticides and repellents | 11      | 2 (18.2%)                 | 62.0 (55.2)                       | 7            | 2 (28.6%)        | 62.0 (55.2)                       | 22           | 4 (18.2%)        | 130.5 (87.0)                      |
| Respiratory system                                  | 163     | 40 (24.5%)                | 137.0 (173.5)                     | 113          | 28 (24.8%)       | 75.9 (85.5)                       | 155          | 50 (32.3%)       | 196.5 (192.9)                     |
| Sensory organs                                      | 138     | 47 (34.1%)                | 117.3 (103.5)                     | 86           | 32 (37.2%)       | 109.9 (115.8)                     | 159          | 72 (45.3%)       | 180.2 (165.1)                     |
| Various                                             | 159     | 15 (9.4%)                 | 244.3 (249.7)                     | 35           | 4 (11.4%)        | 40.0 (20.7)                       | 26           | 7 (26.9%)        | 67.9 (34.2)                       |

DIN: drug identification number; B: branded manufacturers; G: generic manufacturer; BIO: biologic manufacturer; \*shortage duration among those in shortage

<sup>a</sup> On provincial formulary in at least one of the provinces except Quebec;

<sup>b</sup> Top 50 manufacturers by drug cost from public drug plans in Canada in 2017/18;

<sup>c</sup> Manufacturer size was defined by the total number of DINs. Small: [1,40), Medium: [40,99], Large: 100+;

<sup>d</sup> Type of manufacturer was defined based on the proportion of branded DINs by each manufacturer. Branded if the proportion  $\geq 95\%$ ; Generic if the proportion is  $\leq 5\%$ .
