# Supplementary material
Source: PubMed Central journal article supplement (PMC7641197)
Supplement: supp_8.3.E535_2020-0036-5-at.pdf [file supp_8.3.E535_2020-0036-5-at.pdf]

## Appendices (as supplied by the author)

### Appendix 5. Pairwise results from the model estimating the association between factors and shortage at the market level

| Parameter        | Level                      | Reference level            | OR (95% CI)         | P value |
|------------------|----------------------------|----------------------------|---------------------|---------|
| Market Structure | B only                     | B/G Multiple               | 9.08 (5.08, 16.22)  | <.0001  |
|                  | B only                     | B/G Single                 | 1.15 (0.76, 1.76)   | 0.509   |
|                  | B only                     | BIO                        | 1.02 (0.67, 1.55)   | 0.933   |
|                  | B only                     | G multiple                 | 2.01 (1.36, 2.97)   | 0.000   |
|                  | B only                     | G single                   | 0.58 (0.44, 0.76)   | <.0001  |
|                  | B/G Multiple               | B/G Single                 | 0.13 (0.06, 0.25)   | <.0001  |
|                  | B/G Multiple               | BIO                        | 0.11 (0.06, 0.23)   | <.0001  |
|                  | B/G Multiple               | G multiple                 | 0.22 (0.11, 0.43)   | <.0001  |
|                  | BIO                        | B/G Single                 | 1.13 (0.65, 1.97)   | 0.660   |
|                  | G multiple                 | B/G Single                 | 0.57 (0.34, 0.97)   | 0.037   |
|                  | G multiple                 | BIO                        | 0.51 (0.30, 0.85)   | 0.011   |
|                  | G single                   | B/G Multiple               | 15.71 (8.62, 28.63) | <.0001  |
|                  | G single                   | B/G Single                 | 1.99 (1.28, 3.11)   | 0.002   |
|                  | G single                   | BIO                        | 1.76 (1.14, 2.72)   | 0.011   |
| G single         | G multiple                 | 3.48 (2.31, 5.24)          | <.0001              |         |
| Route Form       | Injection                  | Oral solid regular release | 1.14 (0.82, 1.59)   | 0.424   |
|                  | Oral non-solid             | Injection                  | 1.45 (0.93, 2.27)   | 0.100   |
|                  | Oral non-solid             | Oral solid regular release | 1.66 (1.11, 2.49)   | 0.014   |
|                  | Oral non-solid             | Oral solid special release | 1.58 (0.89, 2.78)   | 0.115   |
|                  | Oral non-solid             | Other                      | 1.27 (0.79, 2.05)   | 0.321   |
|                  | Oral solid special release | Injection                  | 0.92 (0.54, 1.56)   | 0.758   |
|                  | Oral solid special release | Oral solid regular release | 1.05 (0.66, 1.68)   | 0.830   |
|                  | Other                      | Injection                  | 1.14 (0.74, 1.75)   | 0.546   |
|                  | Other                      | Oral solid regular release | 1.31 (0.89, 1.91)   | 0.171   |
|                  | Other                      | Oral solid special release | 1.24 (0.72, 2.14)   | 0.439   |
