# Supplementary material
Source: PubMed Central journal article supplement (PMC7641197)
Supplement: supp_8.3.E535_2020-0036-6-at.pdf [file supp_8.3.E535_2020-0036-6-at.pdf]

## Appendices (as supplied by the author)

### Appendix 6. Sensitivity analysis results on the association between factors and shortage at the market level (defined by active ingredients, route and form)

| Parameter                                                | Parameter level                                                     | OR (95% CI)       | Overall p-value* |
|----------------------------------------------------------|---------------------------------------------------------------------|-------------------|------------------|
| Market Structure                                         | B/G Multiple                                                        | 0.12 (0.04, 0.37) | <0.001           |
|                                                          | B only                                                              | 1.57 (0.86, 2.89) |                  |
|                                                          | G single                                                            | 2.64 (1.38, 5.05) |                  |
|                                                          | G multiple                                                          | 0.51 (0.22, 1.18) |                  |
|                                                          | BIO                                                                 | 1.48 (0.70, 3.12) |                  |
|                                                          | B/G Single                                                          | 1                 |                  |
| Route form                                               | Injection                                                           | 1.61 (0.99, 2.64) | 0.002            |
|                                                          | Oral non-Solid                                                      | 2.35 (1.37, 4.03) |                  |
|                                                          | Oral solid special release                                          | 1.23 (0.49, 3.08) |                  |
|                                                          | Other                                                               | 2.64 (1.58, 4.41) |                  |
|                                                          | Oral solid regular release                                          | 1                 |                  |
| Proportion of DINs on formulary (per 10% increase)       |                                                                     | 1.03 (1.00, 1.07) | 0.090            |
| Anatomical Therapeutic Chemical Classification (Level 1) | Alimentary tract and metabolism                                     | 0.27 (0.12, 0.60) | 0.012            |
|                                                          | Blood and blood forming organs                                      | 0.17 (0.05, 0.56) |                  |
|                                                          | Cardiovascular system                                               | 0.53 (0.24, 1.16) |                  |
|                                                          | Dermatologicals                                                     | 0.44 (0.23, 0.83) |                  |
|                                                          | Genito-urinary system and sex hormones                              | 0.63 (0.31, 1.28) |                  |
|                                                          | Systemic hormonal preparations, excluding sex hormones and insulins | 0.46 (0.19, 1.12) |                  |
|                                                          | Anti-infectives for systemic use                                    | 0.54 (0.28, 1.06) |                  |
|                                                          | Antineoplastic and immunomodulating agents                          | 0.29 (0.14, 0.62) |                  |
|                                                          | Musculoskeletal system                                              | 0.69 (0.27, 1.73) |                  |
|                                                          | Nervous system                                                      | 0.35 (0.17, 0.69) |                  |
|                                                          | Antiparasitic products, insecticides and repellents                 | 1.23 (0.21, 7.30) |                  |
|                                                          | Respiratory system                                                  | 0.57 (0.30, 1.09) |                  |
|                                                          | Various                                                             | 0.30 (0.12, 0.72) |                  |
|                                                          | Sensory organs                                                      | 1                 |                  |
|                                                          | Model fit statistics                                                | C-statistic       |                  |
| AIC                                                      |                                                                     | 1327.50           |                  |
| Log likelihood                                           |                                                                     | -639.75           |                  |

B: branded manufacturers; G: generic manufacturer; OR: Odds Ratio; CI: Confidence Interval; DIN: drug identification number; AIC: Akaike information criteria

\* Based on Type III Wald Test.
