# Supplementary material
Source: PubMed Central journal article supplement (PMC7641197)
Supplement: supp_8.3.E535_2020-0036-7-at.pdf [file supp_8.3.E535_2020-0036-7-at.pdf]

## Appendices (as supplied by the author)

### Appendix 7. The association between factors and shortage at the DIN level among DINs listed on formularies

| Parameter                                                | Parameter level            | Branded           |                  | Generic           |                  |
|----------------------------------------------------------|----------------------------|-------------------|------------------|-------------------|------------------|
|                                                          |                            | OR (95% CI)       | Overall p-value* | OR (95% CI)       | Overall p-value* |
| Market structure                                         | B/G Multiple               | 0.69 (0.46, 1.05) | 0.220            | 0.62 (0.44, 0.88) | 0.024            |
|                                                          | B only                     | 0.78 (0.53, 1.15) |                  |                   |                  |
|                                                          | G single                   |                   |                  | 0.62 (0.41, 0.92) |                  |
|                                                          | G multiple                 |                   |                  | 0.58 (0.40, 0.82) |                  |
|                                                          | B/G Single                 | 1                 |                  | 1                 |                  |
| DIN age (every year increase)                            |                            | 1.02 (1.01, 1.03) | <0.001           |                   |                  |
| DIN age                                                  | ≥3yr                       |                   |                  | 1.74 (1.42, 2.14) | <0.001           |
|                                                          | <3yr                       |                   |                  | 1                 |                  |
| Route form                                               | Injection                  | 1.56 (0.94, 2.61) | 0.098            | 1.13 (0.83, 1.54) | 0.853            |
|                                                          | Oral non-solid             | 1.13 (0.63, 2.00) |                  | 1.03 (0.67, 1.57) |                  |
|                                                          | Oral solid special release | 0.79 (0.51, 1.23) |                  | 0.95 (0.75, 1.20) |                  |
|                                                          | Other                      | 1.62 (0.97, 2.69) |                  | 1.16 (0.80, 1.68) |                  |
|                                                          | Oral solid regular release | 1                 |                  | 1                 |                  |
| Interaction of manufacturer type and top 50 manufacturer | Branded=No, Top50=No       | 2.20 (0.92, 5.28) | 0.015            |                   |                  |
|                                                          | Branded=No, Top50=Yes      | 2.02 (1.28, 3.18) |                  |                   |                  |
|                                                          | Branded=Yes, Top50=No      | 1.47 (0.97, 2.22) |                  |                   |                  |
|                                                          | Branded=Yes, Top50=Yes     | 1                 |                  |                   |                  |
| Interaction of manufacturer size and top 50 manufacturer | large, top50=No            |                   |                  | 1.87 (1.21, 2.88) | <0.001           |
|                                                          | large, top50=Yes           |                   |                  | 2.48 (1.68, 3.65) |                  |
|                                                          | medium, top50=No           |                   |                  | 2.32 (1.44, 3.75) |                  |
|                                                          | medium, top50=Yes          |                   |                  | 2.87 (1.58, 5.19) |                  |
|                                                          | Small                      |                   |                  | 1                 |                  |
| Essential medicine                                       | Yes                        |                   |                  | 1.15 (0.99, 1.32) | 0.061            |

|                                                          |                                                                     | No                |       | 1                 |        |
|----------------------------------------------------------|---------------------------------------------------------------------|-------------------|-------|-------------------|--------|
| N of provinces on formulary (weighted)                   |                                                                     |                   |       | 1.10 (1.08, 1.13) | <0.001 |
| Listing price                                            |                                                                     | 1.00 (0.99, 1.00) | 0.065 |                   |        |
| Anatomical Therapeutic Chemical Classification (Level 1) | Alimentary tract and metabolism                                     | 0.66 (0.29, 1.50) | 0.047 | 0.49 (0.28, 0.88) | 0.002  |
|                                                          | Blood and blood forming organs                                      | 0.48 (0.16, 1.45) |       | 0.12 (0.04, 0.36) |        |
|                                                          | Cardiovascular system                                               | 0.89 (0.41, 1.93) |       | 0.50 (0.29, 0.86) |        |
|                                                          | Dermatologicals                                                     | 0.50 (0.24, 1.01) |       | 0.43 (0.23, 0.79) |        |
|                                                          | Genito-urinary system and sex hormones                              | 0.63 (0.29, 1.36) |       | 0.64 (0.35, 1.19) |        |
|                                                          | Systemic hormonal preparations, excluding sex hormones and insulins | 0.25 (0.09, 0.67) |       | 0.56 (0.26, 1.20) |        |
|                                                          | Anti-infectives for systemic use                                    | 0.43 (0.19, 0.99) |       | 0.63 (0.36, 1.11) |        |
|                                                          | Antineoplastic and immunomodulating agents                          | 0.39 (0.15, 1.00) |       | 0.61 (0.32, 1.17) |        |
|                                                          | Musculoskeletal system                                              | 0.92 (0.35, 2.38) |       | 0.45 (0.25, 0.81) |        |
|                                                          | Nervous system                                                      | 0.58 (0.27, 1.22) |       | 0.60 (0.35, 1.02) |        |
|                                                          | Antiparasitic products, insecticides and repellents                 | 1.20 (0.17, 8.67) |       | 0.48 (0.14, 1.69) |        |
|                                                          | Respiratory system                                                  | 0.84 (0.41, 1.73) |       | 0.85 (0.48, 1.51) |        |
|                                                          | Various                                                             | 0.56 (0.10, 2.99) |       | 0.94 (0.28, 3.19) |        |
|                                                          | Sensory organs                                                      | 1                 |       | 1                 |        |
| Model fit statistics                                     | C-statistic                                                         | 0.672             |       | 0.62              |        |
|                                                          | AIC                                                                 | 1630.5037         |       | 6198.62           |        |
|                                                          | Log likelihood                                                      | -790.2518         |       | -3071.31          |        |

DIN: drug identification number; B: branded manufacturers; G: generic manufacturer; OR: Odds Ratio; CI: Confidence Interval; AIC: Akaike information criteria

\* Based on Type III Wald Test.
