# Supplementary material
Source: PubMed Central journal article supplement (PMC7641197)
Supplement: supp_8.3.E535_original-submission.pdf [file supp_8.3.E535_original-submission.pdf]

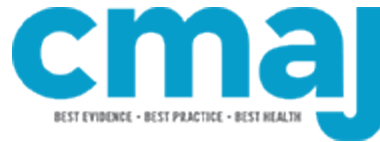

## Factors Associated with Drug Shortages in Canada: A Retrospective Cohort Study

|                               |                                                                                                                                                                                                                                                                                                                                                                                                                                                                                                                                                                                                                                                                                                                                                                                                                                                                                                                                                                                                                                                                                                                                                                                                                                                                                                                                                                                                                                                                            |
|-------------------------------|----------------------------------------------------------------------------------------------------------------------------------------------------------------------------------------------------------------------------------------------------------------------------------------------------------------------------------------------------------------------------------------------------------------------------------------------------------------------------------------------------------------------------------------------------------------------------------------------------------------------------------------------------------------------------------------------------------------------------------------------------------------------------------------------------------------------------------------------------------------------------------------------------------------------------------------------------------------------------------------------------------------------------------------------------------------------------------------------------------------------------------------------------------------------------------------------------------------------------------------------------------------------------------------------------------------------------------------------------------------------------------------------------------------------------------------------------------------------------|
| Journal:                      | <i>CMAJ</i>                                                                                                                                                                                                                                                                                                                                                                                                                                                                                                                                                                                                                                                                                                                                                                                                                                                                                                                                                                                                                                                                                                                                                                                                                                                                                                                                                                                                                                                                |
| Manuscript ID                 | CMAJ-19-0632                                                                                                                                                                                                                                                                                                                                                                                                                                                                                                                                                                                                                                                                                                                                                                                                                                                                                                                                                                                                                                                                                                                                                                                                                                                                                                                                                                                                                                                               |
| Manuscript Type:              | Research - Cohort study (retrospective)                                                                                                                                                                                                                                                                                                                                                                                                                                                                                                                                                                                                                                                                                                                                                                                                                                                                                                                                                                                                                                                                                                                                                                                                                                                                                                                                                                                                                                    |
| Date Submitted by the Author: | 23-May-2019                                                                                                                                                                                                                                                                                                                                                                                                                                                                                                                                                                                                                                                                                                                                                                                                                                                                                                                                                                                                                                                                                                                                                                                                                                                                                                                                                                                                                                                                |
| Complete List of Authors:     | Zhang, Wei; Centre for Health Evaluation and Outcome Sciences; University of British Columbia, School of Population and Public Health<br>Guh, Daphne; Centre for Health Evaluation and Outcome Sciences<br>Sun, Huiying; Centre for Health Evaluation and Outcome Sciences<br>Lynd, Larry; University of British Columbia, Collaboration for Outcomes Research and Evaluation, Faculty of Pharmaceutical Sciences<br>Hollis, Aidan; University of Calgary Faculty of Arts, Economics<br>Grootendorst, Paul; University of Toronto, Leslie Dan Faculty of Pharmacy<br>Anis, Aslam; University of British Columbia, School of Population and Public Health; Centre for Health Evaluation and Outcome Sciences                                                                                                                                                                                                                                                                                                                                                                                                                                                                                                                                                                                                                                                                                                                                                                |
| More Detailed Keywords:       | Drug shortage, Generic manufacturer, Branded manufacturer                                                                                                                                                                                                                                                                                                                                                                                                                                                                                                                                                                                                                                                                                                                                                                                                                                                                                                                                                                                                                                                                                                                                                                                                                                                                                                                                                                                                                  |
| Keywords:                     | Drugs, Public Health, Health Policy                                                                                                                                                                                                                                                                                                                                                                                                                                                                                                                                                                                                                                                                                                                                                                                                                                                                                                                                                                                                                                                                                                                                                                                                                                                                                                                                                                                                                                        |
| Abstract:                     | <p><b>Background:</b> Drug shortages are an ongoing concern both in Canada and globally. To monitor the magnitude of the problem, Health Canada since 2017 have required manufacturers to report on drug shortages. This study aimed to identify the factors associated with drug shortages in Canada.</p> <p><b>Methods:</b> Our study sample was all drugs available on the market in March 14, 2017-September 12, 2018 in Canada excluding over-the-counter and ethical drugs. All strengths of the same active ingredient, dosage form and route of administration, regardless of manufacturer, were grouped into a "market". Shortage at the market-level was defined as all dosage strengths being reported in shortage. The factors considered included market structure at baseline, market age, route/dosage form, and Anatomical Therapeutic Chemical classification.</p> <p><b>Results:</b> Among the 2,023 markets included in our analysis, 12.2% markets were reported to be in shortage and the average shortage duration was 107 days (SD=117). Compared with markets with branded manufacturers only, markets with a single generic manufacturer were more likely to be in shortage (odds ratio=1.48, 95% CI (1.01-2.16)) while markets with multiple generic manufacturers were less likely to be in shortage. Markets with complicated routes/dosage forms were more likely to be in shortage than those that were oral solid with regular release.</p> |

1  
2  
3  
4  
5  
6  
7  
8  
9  
10  
11  
12  
13  
14  
15  
16  
17  
18  
19  
20  
21  
22  
23  
24  
25  
26  
27  
28  
29  
30  
31  
32  
33  
34  
35  
36  
37  
38  
39  
40  
41  
42  
43  
44  
45  
46  
47  
48  
49  
50  
51  
52  
53  
54  
55  
56  
57  
58  
59  
60

|  |                                                                                                                                                                                                                                                                                                                                          |
|--|------------------------------------------------------------------------------------------------------------------------------------------------------------------------------------------------------------------------------------------------------------------------------------------------------------------------------------------|
|  | Interpretation: Relatively tight profit margins (which occurs with a single generic manufacturer but not typically with a single branded manufacturer) might lead to shortages. Similarly, shortages were more common in markets with small numbers of manufacturers and markets with complicated administration or delivery mechanisms. |
|  |                                                                                                                                                                                                                                                                                                                                          |

SCHOLARONE™  
Manuscripts

## Factors Associated with Drug Shortages in Canada: A Retrospective Cohort Study

Wei Zhang<sup>1,2</sup>, PhD; Daphne P. Guh<sup>1</sup>, MSc; Huiying Sun<sup>1</sup>, PhD; Larry D. Lynd<sup>1,3</sup>, PhD;  
Aidan Hollis<sup>4</sup>, PhD; Paul Grootendorst<sup>5</sup>, PhD; Aslam H. Anis<sup>1,2</sup>, PhD

1. Centre for Health Evaluation and Outcome Sciences, St. Paul's Hospital, Vancouver, BC, Canada
2. School of Population and Public Health, University of British Columbia, Vancouver, BC, Canada
3. Faculty of Pharmaceutical Sciences, University of British Columbia, Vancouver, BC, Canada
4. Department of Economics, University of Calgary, Calgary, AB, Canada
5. Leslie Dan Faculty of Pharmacy, University of Toronto, Toronto, ON, Canada

### Corresponding Author

Wei Zhang  
Centre for Health Evaluation and Outcome Sciences  
St. Paul's Hospital  
588-1081 Burrard Street, Vancouver, BC  
Canada V6Z 1Y6  
Tel: +1-604-806-9343  
Email: wzhang@cheos.ubc.ca

### Funding Statement

This study was funded by the Canadian Institutes of Health Research Project Grant (application number 377767).

1  
2  
3 **Competing Interests**  
4

5 Dr Hollis has received compensation for having provided expert reports relating to patent  
6 litigation on behalf of Apotex, Evolution, Mylan and Pharmascience. None of these reports are  
7 related to the topic of the paper. All other authors declare no conflict of interest.  
8  
9  
10  
11  
12  
13  
14  
15  
16  
17  
18  
19  
20  
21  
22  
23  
24  
25  
26  
27  
28  
29  
30  
31  
32  
33  
34  
35  
36  
37  
38  
39  
40  
41  
42  
43  
44  
45  
46  
47  
48  
49  
50  
51  
52  
53  
54  
55  
56  
57  
58  
59  
60

Confidential

## Abstract

**Background:** Drug shortages are an ongoing concern both in Canada and globally. To monitor the magnitude of the problem, Health Canada since 2017 have required manufacturers to report on drug shortages. This study aimed to identify the factors associated with drug shortages in Canada.

**Methods:** Our study sample was all drugs available on the market in March 14, 2017-September 12, 2018 in Canada excluding over-the-counter and ethical drugs. All strengths of the same active ingredient, dosage form and route of administration, regardless of manufacturer, were grouped into a “market”. Shortage at the market-level was defined as all dosage strengths being reported in shortage. The factors considered included market structure at baseline, market age, route/dosage form, and Anatomical Therapeutic Chemical classification.

**Results:** Among the 2,023 markets included in our analysis, 12.2% markets were reported to be in shortage and the average shortage duration was 107 days (SD=117). Compared with markets with branded manufacturers only, markets with a single generic manufacturer were more likely to be in shortage (odds ratio=1.48, 95% CI (1.01-2.16)) while markets with multiple generic manufacturers were less likely to be in shortage. Markets with complicated routes/dosage forms were more likely to be in shortage than those that were oral solid with regular release.

**Interpretation:** Relatively tight profit margins (which occurs with a single generic manufacturer but not typically with a single branded manufacturer) might lead to shortages. Similarly,

1  
2  
3  
4  
5  
6  
7  
8  
9  
10  
11  
12  
13  
14  
15  
16  
17  
18  
19  
20  
21  
22  
23  
24  
25  
26  
27  
28  
29  
30  
31  
32  
33  
34  
35  
36  
37  
38  
39  
40  
41  
42  
43  
44  
45  
46  
47  
48  
49  
50  
51  
52  
53  
54  
55  
56  
57  
58  
59  
60

shortages were more common in markets with small numbers of manufacturers and markets with complicated administration or delivery mechanisms.

Confidential

## INTRODUCTION

Shortages of EpiPen for severe allergies,<sup>1-3</sup> opioid drugs,<sup>4-6</sup> and bupropion for mental illnesses<sup>7</sup> have recently made headlines in Canada and globally. Such shortages can have severe consequences for patients and affect health care delivery costs.<sup>8</sup> For example, opioid shortages increase the risk for medication errors (delayed time to analgesia, side effects, etc.) when patients are administered a less familiar alternative, which leads to unnecessary patient suffering and longer hospital stays.<sup>4,9</sup> Drug shortages can even be life-threatening; for example, there is an association between shortages in generic intravenous norepinephrine and increased mortality among patients with septic shock.<sup>10</sup> In addition, drug shortages can aggravate the stress and burden on physicians and pharmacists and increase labour costs when they have to change their practices due to drug shortages.<sup>8,9</sup> Furthermore, a study from the United States (US) has found that prices increase after drug shortages.<sup>11</sup> In the United Kingdom, after one of the generic manufacturers stopped producing buprenorphine, amid fears of an impending shortage, the government allowed generic versions of this drug to be dispensed at the price of the branded product (i.e. a 700% spike in price).<sup>5</sup>

Many of the reported reasons for drug shortages include manufacturing quality issues, regulatory issues, availability of active ingredients, and the increasing demand for medicines.<sup>8,12-14</sup> Furthermore, researchers and policy-makers have identified underlying factors such as single source product or concentrated markets, and the low price of generic drugs at which generic manufacturers are able to continue producing profitably.<sup>8,12,13</sup> There are several empirical studies that identify the underlying causes of the shortages for generics, vaccines, and injectable drugs.

1  
2  
3 These studies indicate that in the US, manufacturing-quality problems,<sup>15,16</sup> declines in the  
4 number of suppliers,<sup>16</sup> and lower generic drug prices<sup>17-19</sup> are all possible causes.  
5  
6  
7  
8  
9

10 The bulk of the existing empirical studies on drug shortages were conducted in the US because  
11 of the availability of longitudinal, high-quality information on drug shortages on the website of  
12 the Food and Drug Administration (FDA)<sup>20</sup> and website of American Society of Health-System  
13 Pharmacists.<sup>21</sup> In Canada, while the voluntary reporting of drug shortages goes back to 2011, the  
14 response from manufacturers was slow and incomplete until mandatory reporting was  
15 implemented on March 14, 2017.<sup>22-25</sup> Despite the fact that Health Canada and researchers have  
16 recognized the negative impact of drug shortages on patients, health care professionals and the  
17 health care system, the empirical evidence on the major factors associated with drug shortages in  
18 Canada is sparse.<sup>12,22,23,26</sup>  
19  
20  
21  
22  
23  
24  
25  
26  
27  
28  
29  
30  
31  
32

## 33 **METHODS**

### 34 **Study Data and Sample**

35 Drug shortage information starting from March 14, 2017 (mandatory reporting) to September 12,  
36 2018 (about 18 months) was extracted from the Canadian Drug Shortage website.<sup>24</sup> The national  
37 list comprises manufacturer-reported shortages in the drug manufacturing phase. A  
38 pharmaceutical company that knows that they will experience important delays in supplying the  
39 Canadian market with an approved drug is required to report it as a 'drug shortage' in the  
40 Canadian Drug Shortage Database. The database contains information on the specific package  
41 code of a drug identification number (DIN) that is in shortage, shortage start date, shortage  
42 reasons, and actual or expected shortage end date, where DIN is a unique number to indicate a  
43  
44  
45  
46  
47  
48  
49  
50  
51  
52  
53  
54  
55  
56  
57  
58  
59  
60



1  
2  
3 drug's active ingredients, strength, dosage form, route of administration and manufacturer while  
4  
5 the package code distinguishes different package sizes for each DIN.  
6  
7  
8  
9

10 In addition to the drug shortage database, other data sources include the Health Canada Drug  
11 Product Database (DPD)<sup>27</sup> and pharmacy ordering data from PharmaClick, a drug wholesaler.  
12  
13 The DPD contains detailed drug information on all drugs that are available in Canada, which  
14  
15 includes each DIN's active ingredients, strength, dosage form, route of administration,  
16  
17 manufacturer, package code, Anatomical Therapeutic Chemical (ATC) classification, schedule  
18  
19 (prescription, over the counter (OTC), Ethical, Controlled Drugs and Substances Act (CDSA),  
20  
21 Biological, etc.), and market status (marketed, cancelled, dormant). Details on definitions of each  
22  
23 term can be found on the website.<sup>28</sup> PharmaClick provides supplementary information for the  
24  
25 drugs that are available for pharmacies to order.  
26  
27  
28  
29  
30  
31  
32

33 Our study sample was all DINs marketed in Canada from March 14, 2017 to September 12, 2018  
34  
35 excluding the schedule of OTC and ethical drugs. The follow up time period of each DIN was its  
36  
37 time on the market during the study period. DINs with the same active ingredients, dosage form  
38  
39 and route of administration were then organized into a group, called a "market".  
40  
41  
42  
43

#### 44 **Main Outcome and Factors**

45  
46 Our main outcome is the indicator of a drug shortage at the market level. A market is defined to  
47  
48 be in "shortage" if all dosage strengths in a market and all of their package sizes were reported to  
49  
50 be in shortage. The shortage duration was then defined as the duration that the entire market was  
51  
52 in shortage.  
53  
54  
55  
56  
57  
58  
59  
60

1  
2  
3  
4  
5 We considered the following factors potentially associated with drug shortages at the market  
6 level: 1) market structure (i.e. branded manufacturers only; branded manufacturers and a single  
7 generic manufacturer; branded manufacturers and multiple generic manufacturers; biologics; a  
8 single generic manufacturer only; and, multiple generic manufacturers) at baseline where  
9 baseline was defined as first 30 days of follow-up period; 2) market age at start of follow up (< 5  
10 years, ≥ 5 years); 3) route/dosage form (injection, oral non-solid, oral solid special release, oral  
11 solid regular release, other route/form (such as topical cream/ointment, ophthalmic solution,  
12 inhalation solution, inhalation power, transdermal patch, nasal spray, etc.)); and, 4) Anatomical  
13 Therapeutic Chemical (ATC) classification.  
14  
15  
16  
17  
18  
19  
20  
21  
22  
23  
24  
25  
26  
27

28 The Canadian Drug Shortage Database includes reasons for the shortage, as reported by  
29 manufacturers. Manufacturers can select from the following: shortage of an active or inactive  
30 ingredient or component, disruption of the manufacture of the drug, requirements related to  
31 complying with good manufacturing practices, delay in shipping of the drug, and demand  
32 increase for the drug. Otherwise, manufacturers can comment on other reasons and based on  
33 their comments, we categorized them into either one of the above reasons or into insufficient  
34 supply, business or economic reasons, or others/unknown. In our analysis of the shortage  
35 duration among those markets in shortage, we further defined the reasons at market level and  
36 considered the reasons as one potential factor associated with shortage duration. The reported  
37 reason was used when all DINs in the market in shortage were due to the same reason; however,  
38 when more than one reason was indicated, we defined it as “multiple reasons”.  
39  
40  
41  
42  
43  
44  
45  
46  
47  
48  
49  
50  
51  
52  
53  
54  
55  
56  
57  
58  
59  
60

## Analyses

The proportion of markets in shortage and the duration of shortages at the market level among those in shortage were summarized according to specific factors. The association between the factors and drug shortages at market level was assessed using a logistic regression model. The shortage duration was examined using a zero-truncated negative binomial regression model. Sensitivity analyses were conducted by defining “market” by active ingredients only.

## RESULTS

Our analysis consisted of 2,023 markets (10,067 DINs). Of them, 12.2% markets (n=246) were reported in shortage and the average number of days in shortage was 107 (standard deviation (SD): 117) and median number of days in shortage was 67 (Q1=26, Q3=142). Markets with a single generic manufacturer had the highest proportion (25.5%) of shortage with mean shortage duration of 132.9 days (SD=126.2) (Table 1). Markets that are more complex with respect to route/form were more likely to be in shortage and have a longer shortage duration: 23.0% (112.4 days) for “other complex form/route” vs. 19.2% (107.1 days) for oral non-solid vs. 6.2% (87.1 days) for regular oral solid. Markets that have been in existence for 5 years or longer were more likely to be in shortage (13.8% vs 4.2%), and markets of drugs for sensory organs were most likely to be in shortage (30.6% in shortage for a mean 120.9 days).

The multivariate logistic regression results in Table 2 show that compared with markets with branded manufacturers only, markets with a single generic manufacturer were more likely to be in shortage (odds ratio (OR)=1.48; 95% confidence interval (CI) 1.01, 2.16) while markets with multiple generic manufacturers with or without branded manufacturers were 92% or 66% less

1  
2  
3 likely to be in shortage, respectively. Older markets (on market  $\geq 5$  years) were four times more  
4 likely to be in shortage (OR=4.08; 95% CI 2.43, 7.11)) than markets less than 5 years old.  
5  
6 Markets with complex routes/dosage forms (oral non-solid (OR=2.15; 95% CI 1.25, 3.71) and  
7  
8 other complicated routes/forms (OR=2.51; 95% CI 1.50, 4.22)) were more likely to be in  
9  
10 shortage than those of the oral solid regular release. The sensory organ ATC class was mostly  
11  
12 likely to be in shortage. In a secondary analysis, we used a different definition of the market (i.e.,  
13  
14 a group of DINs with the same active ingredients) and our results were similar (Appendix Table  
15  
16  
17  
18  
19  
20  
21  
22  
23  
24  
25  
26  
27  
28  
29  
30  
31  
32  
33  
34  
35  
36  
37  
38  
39  
40  
41  
42  
43  
44  
45  
46  
47  
48  
49  
50  
51  
52  
53  
54  
55  
56  
57  
58  
59  
60

Appendix Table 2 presents the corresponding reasons for 5,268 shortage incidents reported by  
manufacturers. A disruption of the manufacture of the drug, a delay in shipping, and an increase  
in demand for the drug were reported most frequently as the cause of the shortage. We further  
examined factors (including the aggregated reasons at the market level) associated with the  
duration of shortage among those markets in shortage (Table 3). Market age and route/dosage  
form were not significantly associated with shortage duration and thus not included in our final  
regression model. We found that markets with a single generic manufacturer tended to have a  
longer duration of shortage than markets with branded-manufacturers only. Markets in shortage  
due to a demand increase or a compliance issue with the manufacturing process were of the  
shortest duration while the markets that were in shortage due to disruption in the manufacture of  
the drug, shortage of ingredient(s) or business or economic reasons had longer duration.

## INTERPRETATION

Our study focused on drug shortages at the market level i.e., all drugs with the same active ingredients, routes of administration and dosage forms were in shortage. Our main finding was that the markets with a single generic manufacturer were the most vulnerable, i.e., associated with a higher odds of a drug shortage. This suggests that relatively low profit margins (which occurs with a single generic manufacturer but not typically with a single branded manufacturer) may lead to shortages. Furthermore, markets with fewer suppliers (i.e., markets with branded only or with single generic manufacturer only) were more vulnerable to shortages. In addition, in our exploratory analysis, we found no shortages occurring in the markets  $\leq 2$  years and in our final analysis using 5 years as the cut-off, we still found fewer shortages in newer markets, which suggests that manufacturers pay more attention to their supply of the relatively newer products than older products. Another possible reason for older markets having more shortages is that provincial governments restrict price increases for drugs.<sup>29</sup> The markets with complicated routes or formulations requiring complicated manufacturing processes were more susceptible to shortages than oral solid regular release drugs although the generic pricing regulations have been allowing a higher reimbursement price for non-oral solid drugs.<sup>30,31</sup> In terms of shortage duration, the disruption in the manufacture of the drug, shortage of ingredient(s) or business or economic reasons were associated with a longer duration.

Our study is among the first that examines the underlying factors associated with drug shortages. Some of our study findings are consistent with those from the US Government Accountability Office who identified all factors (a decline in the number of suppliers, not complying with manufacturing standards, and drugs with sales of a generic version) that were strongly associated

1  
2  
3 with shortages of sterile injectable anti-infective and cardiovascular drugs in 2012-2014 in the  
4 US.<sup>16</sup> Dave et al. found that special formulations such as solutions and extended-release capsules  
5  
6 were associated with higher risks of generic drug shortages in the US.<sup>19</sup> Donelle et al. were the  
7  
8 first to assess drug shortage problem using the Canadian drug shortage database.<sup>23</sup> However,  
9  
10 their analyses were based on the data reported between 2010 and 2017 (prior to the mandatory  
11  
12 reporting), which were incomplete and inaccurate.  
13  
14  
15  
16  
17  
18

19 Compared with previous studies, one of our study's strengths is that we focused on shortages at  
20  
21 the market level rather than at DIN or drug product level. This perspective is more relevant as it  
22  
23 speaks to real shortage scenarios as opposed to a situation in which one manufacturer is not  
24  
25 supplying but others are. The latter impacts patients less as they can switch brands, or even  
26  
27 dosage forms, if necessary to ensure continued therapy. In addition, we considered all active  
28  
29 drugs in Canada that can be used in both community and hospital settings instead of focusing on  
30  
31 generic drugs for outpatient use only<sup>19</sup> or drugs for certain diseases.<sup>16-18</sup>  
32  
33  
34  
35  
36  
37

38 Our study did not explicitly consider price as a factor. While lower prices have been found to be  
39  
40 associated with shortages of generic drugs,<sup>16</sup> generic sterile injectable drugs,<sup>17</sup> and vaccines,<sup>18</sup>  
41  
42 these results are not comparable or relevant to our setting as our study focused on market level  
43  
44 and not on specific drug versions. Given that we defined a shortage as when all versions were in  
45  
46 shortage, comparing prices across different types of drug markets is not meaningful. Typically,  
47  
48 prices for branded, generic, and biologic drugs are determined through different mechanisms and  
49  
50 regulated by different pricing policies. In Canada, prices of generic drugs covered under publicly  
51  
52 funded insurance programs have been regulated by pan-Canadian tiered pricing framework or by  
53  
54  
55  
56  
57  
58  
59  
60

1  
2  
3 the provincial price-cap policies,<sup>30,31</sup> under which generic prices are capped at specified  
4 percentages of the associated branded drug's price. For patented branded drugs, their prices are  
5 regulated by the Patented Medicine Prices Review Board,<sup>32</sup> assessed for cost-effectiveness by the  
6 Canadian Agency for Drugs and Technologies in Health,<sup>33</sup> and negotiated by the pan-Canadian  
7 Pharmaceutical Alliance.<sup>34</sup> Furthermore, drugs dispensed in hospitals are often purchased and  
8 negotiated by group purchasing organizations (GPOs). Thus, to explore the impact of price on  
9 drug shortages is beyond the scope of this study.

10  
11  
12 Our study has important policy implications on how to prevent shortages. First, drug policies  
13 should focus not only on price, but also on drug supply security. We know that procurement  
14 through GPOs or highly regulated generic pricing (price-capping) policies have been found to  
15 discourage manufacturers from supplying drugs and lead to drug company exits,<sup>35-39</sup> often  
16 resulting in more concentrated markets and perhaps eventually drug shortages. In this context,  
17 some have advocated for the creation of not-for-profit pharmaceutical manufacturing as a  
18 solution.<sup>23</sup> For example, to address shortages and high prices of lifesaving medications, a new  
19 non-profit generic drug company, Civica Rx, has been established in the US.<sup>40</sup> If Canadian  
20 provincial or federal governments were to explore a similar set-up, they would be well advised to  
21 focus on drugs with single suppliers especially the single generic manufacturer, complicated  
22 routes/formulations, and in certain ATC classifications such as sensory organs. However, we are  
23 not advocating the formation of such a state-owned enterprise.

24  
25  
26 Finally, policy makers trying to balance cost-containment with security of drug supply should be  
27 on the lookout for markets with relatively tight profit margins, under pressure of price-capping

1  
2  
3  
4  
5  
6  
7  
8  
9  
10  
11  
12  
13  
14  
15  
16  
17  
18  
19  
20  
21  
22  
23  
24  
25  
26  
27  
28  
29  
30  
31  
32  
33  
34  
35  
36  
37  
38  
39  
40  
41  
42  
43  
44  
45  
46  
47  
48  
49  
50  
51  
52  
53  
54  
55  
56  
57  
58  
59  
60

policies, resulting in a market with a single generic supplier for a drug with a complex administration or delivery mechanism.

Confidential



## References

1. Therrien A. “Quiz parents on adrenaline pen need.”<https://www.bbc.com/news/health-45901529>. Published October 18, 2018. Accessed November 2, 2018.
2. EpiPen shortage is critical – and not easy to fix.<https://www.theglobeandmail.com/opinion/article-epipen-shortage-is-critical-and-not-easy-to-fix/>. Accessed November 2, 2018.
3. Lundy J. EpiPen shortage persists for some.  
<https://www.duluthnewtribune.com/business/healthcare/4503411-epipen-shortage-persists-some>. Published September 23, 2018. Accessed December 21, 2018.
4. Opioid shortages leave US hospitals scrambling - CNN.  
<https://www.cnn.com/2018/03/19/health/hospital-opioid-shortage-partner/index.html>. Accessed November 2, 2018.
5. Doward J. Cost of lifesaving heroin withdrawal drug soars by 700%. *The Observer*.  
<https://www.theguardian.com/politics/2018/sep/29/heroin-withdrawal-generic-drug-price-hike>. Published September 29, 2018. Accessed December 21, 2018.
6. Fentanyl’s spread likely linked to heroin shortage: report | The Chronicle Herald.  
<http://www.thechronicleherald.ca/news/local/fentanyls-spread-likely-linked-to-heroin-shortage-report-265769/>. Accessed December 21, 2018.
7. Crowe K. It’s not just the EpiPen. Canada had 25 new drug shortages this week alone | CBC News. CBC. <https://www.cbc.ca/news/health/second-opinion-drug-shortages180908-1.4815355>. Published September 8, 2018. Accessed September 15, 2018.
8. Ventola CL. The Drug Shortage Crisis in the United States. *P T*. 2011;36(11):740-757.

- 1  
2  
3 9. Bruera E. Parenteral Opioid Shortage — Treating Pain during the Opioid-Overdose  
4 Epidemic. *New England Journal of Medicine*. 2018;379(7):601-603.  
5  
6 doi:10.1056/NEJMp1807117  
7
- 8  
9  
10 10. Vail E, Gershengorn HB, Hua M, Walkey AJ, Rubenfeld G, Wunsch H. Association  
11 Between US Norepinephrine Shortage and Mortality Among Patients With Septic Shock.  
12  
13 *JAMA*. 2017;317(14):1433-1442. doi:10.1001/jama.2017.2841  
14  
15
- 16  
17 11. Hernandez I, Sampathkumar S, Good CB, Kesselheim AS, Shrank WH. Changes in Drug  
18 Pricing After Drug Shortages in the United States. *Ann Intern Med*. September 2018.  
19  
20 doi:10.7326/M18-1137  
21  
22
- 23  
24 12. Gagnon M-A. Drug Shortages: Searching for a Cure. *Healthc Policy*. 2012;7(4):10-17.  
25
- 26  
27 13. Canadian Drug Shortage » Causes. <http://www.canadadrugshortage.com/causes/>. Accessed  
28  
29 March 12, 2015.
- 30  
31 14. Research C for DE and. Drug Shortages - Text Version: Drug Shortages Infographic.  
32  
33 <https://www.fda.gov/Drugs/DrugSafety/DrugShortages/ucm441585.htm>. Accessed  
34  
35 November 2, 2018.  
36  
37
- 38  
39 15. Woodcock J, Wosinska M. Economic and technological drivers of generic sterile injectable  
40 drug shortages. *Clin Pharmacol Ther*. 2013;93(2):170-176. doi:10.1038/clpt.2012.220  
41
- 42  
43 16. U. S. Government Accountability Office. *Drug Shortages: Certain Factors Are Strongly*  
44  
45 *Associated with This Persistent Public Health Challenge*. Washington, DC: U. S.  
46  
47 Government Accountability Office; 2016. <https://www.gao.gov/products/GAO-16-595>.  
48  
49 Accessed November 6, 2018.  
50  
51  
52  
53  
54  
55  
56  
57  
58  
59  
60

17. Yurukoglu A, Liebman E, Ridley DB. The Role of Government Reimbursement in Drug Shortages. *American Economic Journal: Economic Policy*. 2017;9(2):348-382.  
doi:10.1257/pol.20160035
18. Ridley DB, Bei X, Liebman EB. No Shot: US Vaccine Prices And Shortages. *Health Affairs*. 2016;35(2):235-241. doi:10.1377/hlthaff.2015.0420
19. Dave CV, Pawar A, Fox ER, Brill G, Kesselheim AS. Predictors of Drug Shortages and Association with Generic Drug Prices: A Retrospective Cohort Study. *Value in Health*. May 2018. doi:10.1016/j.jval.2018.04.1826
20. US Food and Drug Administration. FDA Drug Shortages.  
<https://www.accessdata.fda.gov/scripts/drugshortages/>. Accessed January 17, 2018.
21. American Society of Health-System Pharmacists. Drug Shortages List.  
<https://www.ashp.org/drug-shortages/current-shortages/drug-shortages-list?page=CurrentShortages>. Accessed January 17, 2018.
22. Duffin J. Canadian drug shortage: recent history of a mystery. *CMAJ*. 2012;184(8):1000-1000. doi:10.1503/cmaj.120527
23. Donelle J, Duffin J, Pipitone J, White-Guay B. *Assessing Canada's Drug Shortage Problem*. Toronto: The C.D. Howe Institute; 2018.
24. Canadian Drug Shortage Database. <http://www.drugshortages.ca/drugshortagehome.asp>. Accessed February 4, 2016.
25. Health Canada. Canada News Centre - Mandatory Reporting of Drugs Shortages and Discontinuances on Track for Spring 2017 Implementation. <http://news.gc.ca/web/article-en.do?nid=1091729>. Published 16:30:00.0. Accessed November 23, 2016.

- 1  
2  
3 26. Health Canada. Progress in Addressing Drug Shortages. <http://www.hc-sc.gc.ca/dhp-mps/prodpharma/shortages-penuries/progress-progres-eng.php>. Published May 9, 2014.  
4  
5  
6  
7 Accessed November 23, 2016.  
8  
9
- 10 27. Health Canada. Drug Product Database. [http://www.hc-sc.gc.ca/dhp-mps/prodpharma/databasdon/dpd\\_bdpp\\_data\\_extract-eng.php](http://www.hc-sc.gc.ca/dhp-mps/prodpharma/databasdon/dpd_bdpp_data_extract-eng.php). Accessed December 12,  
11  
12  
13  
14  
15 2016.  
16
- 17 28. Canada H. Drug Product Database Terminology. aem. <https://www.canada.ca/en/health-canada/services/drugs-health-products/drug-products/drug-product-database/terminology.html>. Published December 9, 2002. Accessed May 6, 2019.  
18  
19  
20  
21  
22  
23
- 24 29. Shajarizadeh A, Hollis A. Price-cap regulation, uncertainty and the price evolution of new  
25  
26  
27  
28  
29  
30  
31  
32  
33  
34  
35  
36  
37  
38  
39  
40  
41  
42  
43  
44  
45  
46  
47  
48  
49  
50  
51  
52  
53  
54  
55  
56  
57  
58  
59  
60
30. Canadian Institute for Health Information. *National Prescription Drug Utilization Information System - Plan Information: Summary of Changes, July 16, 2018*. Ottawa: Canadian Institute for Health Information; 2018.  
[https://secure.cihi.ca/free\\_products/Summary-of-changes-comparison-2018-EN02cg.pdf](https://secure.cihi.ca/free_products/Summary-of-changes-comparison-2018-EN02cg.pdf). Accessed September 10, 2018.
31. Government of Saskatchewan B. Pan-Canadian Generics.  
<http://formulary.drugplan.ehealthsask.ca/PanCanadianGenerics>. Accessed September 10, 2018.
32. Patented Medicine Prices Review Board. Regulatory Process. <http://pmprb-cepmb.gc.ca>. Published March 24, 2014. Accessed January 26, 2018.
33. CADTH. About CADTH. <https://www.cadth.ca/about-cadth>. Accessed March 15, 2017.

- 1  
2  
3 34. The pan-Canadian Pharmaceutical Alliance. *Canada's Premiers*. December 2013.  
4  
5 <http://www.canadaspremiers.ca/pan-canadian-pharmaceutical-alliance/>. Accessed January  
6  
7 23, 2018.  
8  
9  
10 35. Bruhn WE, Fracica EA, Makary MA. Group Purchasing Organizations, Health Care Costs,  
11  
12 and Drug Shortages. *JAMA*. 2018;320(18):1859-1860. doi:10.1001/jama.2018.13604  
13  
14 36. Zhang W, Sun H, Guh D, Anis AH. The impact of price-cap regulations on market entry by  
15  
16 generic pharmaceutical firms. *Expert Rev Pharmacoecon Outcomes Res*. 2017;17(2):231-  
17  
18 238. doi:10.1080/14737167.2017.1271717  
19  
20  
21 37. Zhang W, Guh D, Sun H, Marra C, Lynd L, Anis AH. The impact of price-cap regulations  
22  
23 on exit by generic pharmaceutical firms. *Medical Care*. 2016;54(9):884-890.  
24  
25  
26 38. Costa-Font J, McGuire A, Varol N. Price regulation and relative delays in generic drug  
27  
28 adoption. *Journal of Health Economics*. 2014;38:1-9. doi:10.1016/j.jhealeco.2014.04.004  
29  
30  
31 39. Kanavos P. Measuring performance in off-patent drug markets: a methodological  
32  
33 framework and empirical evidence from twelve EU Member States. *Health Policy*.  
34  
35 2014;118(2):229-241. doi:10.1016/j.healthpol.2014.08.005  
36  
37  
38 40. Civica Rx | Combating Drug Shortages and Affordability. <https://civicarx.org/about/>.  
39  
40 Accessed February 21, 2019.  
41  
42  
43  
44  
45  
46  
47  
48  
49  
50  
51  
52  
53  
54  
55  
56  
57  
58  
59  
60

**Table 1. Markets in shortage and shortage duration**

| Variable<br>Variable Level                                          | Total N | Markets in<br>Shortage<br>N (%) | Shortage Duration<br>among shortage<br>Mean days (SD) |
|---------------------------------------------------------------------|---------|---------------------------------|-------------------------------------------------------|
| Market Type                                                         |         |                                 |                                                       |
| B Only                                                              | 793     | 118 (14.9%)                     | 82.7 (91.5)                                           |
| B/G Single                                                          | 122     | 15 (12.3%)                      | 137.5 (137.9)                                         |
| B/G Multiple                                                        | 324     | 5 (1.5%)                        | 79.0 (66.4)                                           |
| Biologic                                                            | 361     | 35 (9.7%)                       | 103.6 (125.2)                                         |
| G Multiple                                                          | 188     | 13 (6.9%)                       | 187.3 (190.3)                                         |
| G Single                                                            | 235     | 60 (25.5%)                      | 132.9 (126.2)                                         |
| Route/form                                                          |         |                                 |                                                       |
| Injection                                                           | 684     | 74 (10.8%)                      | 115.0 (131.0)                                         |
| Oral Non-Solid                                                      | 156     | 30 (19.2%)                      | 107.1 (124.9)                                         |
| Oral Solid Regular Release                                          | 694     | 43 (6.2%)                       | 87.1 (99.3)                                           |
| Oral Solid Special Release                                          | 97      | 9 (9.3%)                        | 74.3 (82.0)                                           |
| Other                                                               | 392     | 90 (23.0%)                      | 112.4 (114.9)                                         |
| Market Age                                                          |         |                                 |                                                       |
| < 5 years                                                           | 354     | 15 (4.2%)                       | 131.7 (124.7)                                         |
| ≥ 5 years                                                           | 1669    | 231 (13.8%)                     | 105.1 (117.1)                                         |
| Anatomical Therapeutic Chemical classification                      |         |                                 |                                                       |
| Alimentary tract and metabolism                                     | 185     | 12 (6.5%)                       | 89.1 (65.4)                                           |
| Blood and blood forming organs                                      | 85      | 4 (4.7%)                        | 68.3 (39.8)                                           |
| Cardiovascular system                                               | 170     | 15 (8.8%)                       | 78.8 (91.3)                                           |
| Dermatologicals                                                     | 114     | 22 (19.3%)                      | 104.4 (132.4)                                         |
| Genito-urinary system and sex hormones                              | 121     | 17 (14.0%)                      | 75.7 (65.4)                                           |
| Systemic hormonal preparations, excluding sex hormones and insulins | 67      | 10 (14.9%)                      | 133.9 (193.3)                                         |
| Anti-infectives for systemic use                                    | 301     | 42 (14.0%)                      | 138.5 (144.4)                                         |
| Antineoplastic and immunomodulating agents                          | 254     | 18 (7.1%)                       | 87.9 (110.8)                                          |
| Musculoskeletal system                                              | 75      | 10 (13.3%)                      | 169.2 (162.3)                                         |
| Nervous system                                                      | 298     | 25 (8.4%)                       | 122.2 (143.2)                                         |
| Antiparasitic products, insecticides and repellents                 | 9       | 2 (22.2%)                       | 62.0 (55.2)                                           |
| Respiratory system                                                  | 117     | 24 (20.5%)                      | 78.3 (58.9)                                           |
| Sensory organs                                                      | 111     | 34 (30.6%)                      | 120.9 (103.0)                                         |
| Various                                                             | 116     | 11 (9.5%)                       | 49.9 (33.0)                                           |

B: branded manufacturers; G: generic manufacturer

**Table 2. The association between factors and the shortage at market level**

| Parameter                                               | Parameter level                                                     | OR (95% CI)        |
|---------------------------------------------------------|---------------------------------------------------------------------|--------------------|
| Market type                                             | B/G Single                                                          | 0.62 (0.34, 1.12)  |
|                                                         | B/G Multiple                                                        | 0.08 (0.03, 0.21)  |
|                                                         | G single                                                            | 1.48 (1.01, 2.16)  |
|                                                         | G multiple                                                          | 0.34 (0.18, 0.63)  |
|                                                         | Biologic                                                            | 0.82 (0.49, 1.39)  |
|                                                         | B only                                                              | 1.00               |
| Market age                                              | ≥ 5yr                                                               | 4.08 (2.34, 7.11)  |
|                                                         | < 5yr                                                               | 1.00               |
| Route/form                                              | Injection                                                           | 1.54 (0.96, 2.48)  |
|                                                         | Oral Non-Solid                                                      | 2.15 (1.25, 3.71)  |
|                                                         | Oral Solid Special Release                                          | 1.58 (0.72, 3.48)  |
|                                                         | Other                                                               | 2.51 (1.50, 4.22)  |
|                                                         | Oral Solid Regular Release                                          | 1.00               |
| Anatomical<br>Therapeutic<br>Chemical<br>classification | Alimentary tract and metabolism                                     | 1.55 (0.47, 5.11)  |
|                                                         | Cardiovascular system                                               | 2.86 (0.87, 9.36)  |
|                                                         | Dermatologicals                                                     | 2.49 (0.75, 8.26)  |
|                                                         | Genito-urinary system and sex hormones                              | 3.10 (0.96, 9.97)  |
|                                                         | Systemic hormonal preparations, excluding sex hormones and insulins | 2.59 (0.75, 8.97)  |
|                                                         | Anti infectives for systemic use                                    | 3.39 (1.15, 10.00) |
|                                                         | Antineoplastic and immunomodulating agents                          | 1.81 (0.58, 5.63)  |
|                                                         | Musculoskeletal system                                              | 4.14 (1.17, 14.65) |
|                                                         | Nervous system                                                      | 2.09 (0.67, 6.50)  |
|                                                         | Antiparasitic products, insecticides and repellents                 | 6.70 (0.93, 48.27) |
|                                                         | Respiratory system                                                  | 3.56 (1.11, 11.38) |
|                                                         | Sensory organs                                                      | 5.35 (1.65, 17.32) |
| Various                                                 | 1.78 (0.54, 5.88)                                                   |                    |
|                                                         | Blood and blood forming organs                                      | 1.00               |

B: branded manufacturers; G generic manufacturer; OR: Odds Ratio; CI: Confidence Interval

**Table 3. The association between factors and the duration of shortage at market level among those with shortages**

| Parameter   | Parameter level                                                                        | Estimate | SE    | P value |
|-------------|----------------------------------------------------------------------------------------|----------|-------|---------|
| Market type | B/G Single                                                                             | 0.120    | 0.329 | 0.715   |
|             | B/G Multiple                                                                           | -0.369   | 0.548 | 0.501   |
|             | G single                                                                               | 0.375    | 0.191 | 0.051   |
|             | G multiple                                                                             | -0.063   | 0.347 | 0.855   |
|             | Biologic                                                                               | 0.348    | 0.230 | 0.132   |
|             | B only                                                                                 | 0.000    | 0.000 |         |
| Reason      | Disruption of the manufacture, shortage of ingredient or business reason               | 1.222    | 0.245 | <.0001  |
|             | Delay in shipping or insufficient supply                                               | 0.230    | 0.289 | 0.425   |
|             | Multiple or other reasons                                                              | 0.543    | 0.267 | 0.043   |
|             | Demand increase or requirements related to complying with good manufacturing practices | 0.000    | 0.000 |         |

B: branded manufacturers; G generic manufacturer; SE: Standard Error



**Appendix Table 1. The association between factors and the shortage at market level**

| Parameter                                               | Parameter level                                                     | OR (95% CI)           |
|---------------------------------------------------------|---------------------------------------------------------------------|-----------------------|
| Market type                                             | B/G Single                                                          | 0.78 ( 0.37 , 1.64)   |
|                                                         | B/G Multiple                                                        | 0.06 ( 0.02 , 0.20)   |
|                                                         | G single                                                            | 2.00 ( 1.10 , 3.62)   |
|                                                         | G multiple                                                          | 0.35 ( 0.15 , 0.83)   |
|                                                         | Biologic                                                            | 1.04 ( 0.55 , 1.98)   |
|                                                         | B only                                                              | 1.00                  |
| Market age                                              | ≥ 5yr                                                               | 3.20 ( 1.69 , 6.08)   |
|                                                         | < 5yr                                                               | 1.00                  |
| Route/form                                              | Injection                                                           | 1.61 ( 0.87 , 2.97)   |
|                                                         | Oral Non-Solid                                                      | 2.71 ( 1.06 , 6.92)   |
|                                                         | Oral Solid Special Release                                          | 1.24 ( 0.35 , 4.40)   |
|                                                         | Other                                                               | 2.84 ( 1.35 , 6.00)   |
|                                                         | Oral Solid Regular Release                                          | 1.00                  |
| Anatomical<br>Therapeutic<br>Chemical<br>classification | Alimentary tract and metabolism                                     | 1.59 ( 0.37 , 6.72)   |
|                                                         | Cardiovascular system                                               | 3.81 ( 0.95 , 15.35)  |
|                                                         | Dermatologicals                                                     | 1.47 ( 0.31 , 7.08)   |
|                                                         | Genito-urinary system and sex hormones                              | 3.50 ( 0.87 , 14.14)  |
|                                                         | Systemic hormonal preparations, excluding sex hormones and insulins | 4.73 ( 1.10 , 20.34)  |
|                                                         | Anti infectives for systemic use                                    | 3.99 ( 1.14 , 14.00)  |
|                                                         | Antineoplastic and immunomodulating agents                          | 2.08 ( 0.56 , 7.73)   |
|                                                         | Musculoskeletal system                                              | 6.85 ( 1.56 , 30.20)  |
|                                                         | Nervous system                                                      | 1.49 ( 0.35 , 6.36)   |
|                                                         | Antiparasitic products, insecticides and repellents                 | 8.69 ( 1.07 , 70.71)  |
|                                                         | Respiratory system                                                  | 2.78 ( 0.65 , 11.88)  |
|                                                         | Sensory organs                                                      | 10.44 ( 2.54 , 42.99) |
|                                                         | Various                                                             | 2.28 ( 0.56 , 9.33)   |
|                                                         | Blood and blood forming organs                                      | 1.00                  |

B: branded manufacturers; G generic manufacturer

**Appendix Table 2. Reasons reported for drugs in shortage**

| Reason                                                              | All          | Branded     | Generic      | Biologic   | Injection   | Ora Non-solid | Oral Solid Regular Release | Oral Solid Special Release | Other routes/forms |
|---------------------------------------------------------------------|--------------|-------------|--------------|------------|-------------|---------------|----------------------------|----------------------------|--------------------|
| Disruption of the manufacture of the drug                           | 2755 (58.1%) | 263 (36.1%) | 2475 (63.6%) | 17 (13.8%) | 201 (38.3%) | 82 (73.9%)    | 1991 (61.8%)               | 264 (60.0%)                | 217 (48.8%)        |
| Demand increase for the drug                                        | 447 (9.4%)   | 117 (16.1%) | 295 (7.6%)   | 35 (28.5%) | 99 (18.9%)  | 14 (12.6%)    | 253 (7.8%)                 | 42 (9.5%)                  | 39 (8.8%)          |
| Delay in shipping of the drug                                       | 878 (18.5%)  | 159 (21.8%) | 681 (17.5%)  | 38 (30.9%) | 106 (20.2%) | 6 (5.4%)      | 590 (18.3%)                | 88 (20.0%)                 | 88 (19.8%)         |
| Requirements related to complying with good manufacturing practices | 158 (3.3%)   | 14 (1.9%)   | 125 (3.2%)   | 19 (15.4%) | 40 (7.6%)   | 2 (1.8%)      | 85 (2.6%)                  | 16 (3.6%)                  | 15 (3.4%)          |
| Insufficient supply                                                 | 96 (2.0%)    | 13 (1.8%)   | 81 (2.1%)    | 2 (1.6%)   | 11 (2.1%)   | 0 (0.0%)      | 74 (2.3%)                  | 7 (1.6%)                   | 4 (0.9%)           |
| Shortage of an active/inactive ingredient or component              | 144 (3.0%)   | 37 (5.1%)   | 107 (2.7%)   | 0 (0.0%)   | 20 (3.8%)   | 2 (1.8%)      | 102 (3.2%)                 | 7 (1.6%)                   | 13 (2.9%)          |
| Business or economic reasons                                        | 50 (1.1%)    | 7 (1.0%)    | 43 (1.1%)    | 0 (0.0%)   | 4 (0.8%)    | 3 (2.7%)      | 31 (1.0%)                  | 7 (1.6%)                   | 5 (1.1%)           |
| Others/unknown                                                      | 216 (4.6%)   | 118 (16.2%) | 86 (2.2%)    | 12 (9.8%)  | 44 (8.4%)   | 2 (1.8%)      | 97 (3.0%)                  | 9 (2.0%)                   | 64 (14.4%)         |
| The reasons were summarized at shortage report level                |              |             |              |            |             |               |                            |                            |                    |

STROBE Statement—Checklist of items that should be included in reports of *cohort studies*

|                              | Item No | Recommendation                                                                                                                                                                                                                                                                                                         | Page No          |
|------------------------------|---------|------------------------------------------------------------------------------------------------------------------------------------------------------------------------------------------------------------------------------------------------------------------------------------------------------------------------|------------------|
| <b>Title and abstract</b>    | 1       | (a) Indicate the study's design with a commonly used term in the title or the abstract<br>(b) Provide in the abstract an informative and balanced summary of what was done and what was found                                                                                                                          | Title<br>P3      |
| <b>Introduction</b>          |         |                                                                                                                                                                                                                                                                                                                        |                  |
| Background/rationale         | 2       | Explain the scientific background and rationale for the investigation being reported                                                                                                                                                                                                                                   | P5               |
| Objectives                   | 3       | State specific objectives, including any prespecified hypotheses                                                                                                                                                                                                                                                       | P6               |
| <b>Methods</b>               |         |                                                                                                                                                                                                                                                                                                                        |                  |
| Study design                 | 4       | Present key elements of study design early in the paper                                                                                                                                                                                                                                                                | P6 and P7        |
| Setting                      | 5       | Describe the setting, locations, and relevant dates, including periods of recruitment, exposure, follow-up, and data collection                                                                                                                                                                                        | P6 and P7        |
| Participants                 | 6       | (a) Give the eligibility criteria, and the sources and methods of selection of participants. Describe methods of follow-up<br>(b) For matched studies, give matching criteria and number of exposed and unexposed                                                                                                      | P6 and P7<br>N/A |
| Variables                    | 7       | Clearly define all outcomes, exposures, predictors, potential confounders, and effect modifiers. Give diagnostic criteria, if applicable                                                                                                                                                                               | P7 and P8        |
| Data sources/<br>measurement | 8*      | For each variable of interest, give sources of data and details of methods of assessment (measurement). Describe comparability of assessment methods if there is more than one group                                                                                                                                   | P6-P8            |
| Bias                         | 9       | Describe any efforts to address potential sources of bias                                                                                                                                                                                                                                                              | P9               |
| Study size                   | 10      | Explain how the study size was arrived at                                                                                                                                                                                                                                                                              | P7               |
| Quantitative variables       | 11      | Explain how quantitative variables were handled in the analyses. If applicable, describe which groupings were chosen and why                                                                                                                                                                                           | P8 and P9        |
| Statistical methods          | 12      | (a) Describe all statistical methods, including those used to control for confounding<br>(b) Describe any methods used to examine subgroups and interactions<br>(c) Explain how missing data were addressed<br>(d) If applicable, explain how loss to follow-up was addressed<br>(e) Describe any sensitivity analyses | P9               |
| <b>Results</b>               |         |                                                                                                                                                                                                                                                                                                                        |                  |
| Participants                 | 13*     | (a) Report numbers of individuals at each stage of study—eg numbers potentially eligible, examined for eligibility, confirmed eligible, included in the study, completing follow-up, and analysed<br>(b) Give reasons for non-participation at each stage<br>(c) Consider use of a flow diagram                        | P9               |
| Descriptive data             | 14*     | (a) Give characteristics of study participants (eg demographic, clinical, social) and information on exposures and potential confounders<br>(b) Indicate number of participants with missing data for each variable of interest<br>(c) Summarise follow-up time (eg, average and total amount)                         | P9 and Table 1   |
| Outcome data                 | 15*     | Report numbers of outcome events or summary measures over time                                                                                                                                                                                                                                                         | P9               |

|    |                          |    |                                                                                                                                                                                                              |                            |
|----|--------------------------|----|--------------------------------------------------------------------------------------------------------------------------------------------------------------------------------------------------------------|----------------------------|
| 1  | Main results             | 16 | (a) Give unadjusted estimates and, if applicable, confounder-adjusted estimates and their precision (eg, 95% confidence interval). Make clear which confounders were adjusted for and why they were included | P9 and P10; Tables 2 and 3 |
| 2  |                          |    | (b) Report category boundaries when continuous variables were categorized                                                                                                                                    |                            |
| 3  |                          |    | (c) If relevant, consider translating estimates of relative risk into absolute risk for a meaningful time period                                                                                             |                            |
| 4  |                          |    |                                                                                                                                                                                                              |                            |
| 5  |                          |    |                                                                                                                                                                                                              |                            |
| 6  |                          |    |                                                                                                                                                                                                              |                            |
| 7  |                          |    |                                                                                                                                                                                                              |                            |
| 8  |                          |    |                                                                                                                                                                                                              |                            |
| 9  | Other analyses           | 17 | Report other analyses done—eg analyses of subgroups and interactions, and sensitivity analyses                                                                                                               | Appendix Tables 1 and 2    |
| 10 |                          |    |                                                                                                                                                                                                              |                            |
| 11 |                          |    |                                                                                                                                                                                                              |                            |
| 12 | <b>Discussion</b>        |    |                                                                                                                                                                                                              |                            |
| 13 | Key results              | 18 | Summarise key results with reference to study objectives                                                                                                                                                     | P11                        |
| 14 | Limitations              | 19 | Discuss limitations of the study, taking into account sources of potential bias or imprecision. Discuss both direction and magnitude of any potential bias                                                   | P12                        |
| 15 |                          |    |                                                                                                                                                                                                              |                            |
| 16 |                          |    |                                                                                                                                                                                                              |                            |
| 17 | Interpretation           | 20 | Give a cautious overall interpretation of results considering objectives, limitations, multiplicity of analyses, results from similar studies, and other relevant evidence                                   | P11-P13                    |
| 18 |                          |    |                                                                                                                                                                                                              |                            |
| 19 |                          |    |                                                                                                                                                                                                              |                            |
| 20 | Generalisability         | 21 | Discuss the generalisability (external validity) of the study results                                                                                                                                        | P11 and P12                |
| 21 |                          |    |                                                                                                                                                                                                              |                            |
| 22 | <b>Other information</b> |    |                                                                                                                                                                                                              |                            |
| 23 | Funding                  | 22 | Give the source of funding and the role of the funders for the present study and, if applicable, for the original study on which the present article is based                                                | P1                         |
| 24 |                          |    |                                                                                                                                                                                                              |                            |
| 25 |                          |    |                                                                                                                                                                                                              |                            |

26  
27 \*Give information separately for exposed and unexposed groups.

28  
29 **Note:** An Explanation and Elaboration article discusses each checklist item and gives methodological background and published examples of transparent reporting. The STROBE checklist is best used in conjunction with this article (freely available on the Web sites of PLoS Medicine at <http://www.plosmedicine.org/>, Annals of Internal Medicine at <http://www.annals.org/>, and Epidemiology at <http://www.epidem.com/>). Information on the STROBE Initiative is available at <http://www.strobe-statement.org>.

30  
31  
32  
33  
34  
35  
36  
37  
38  
39  
40  
41  
42  
43  
44  
45  
46  
47  
48  
49  
50  
51  
52  
53  
54  
55  
56  
57  
58  
59  
60
